# Supplementary material for: The nanoscale organization of the Nipah virus fusion protein informs new membrane fusion mechanisms
Source: eLife. 2025 Jan 2;13:RP97017. doi: 10.7554/eLife.97017 (PMC11695058; doi:10.7554/eLife.97017)
Supplement: Figure 1—figure supplement 1—source data 2. [file elife-97017-fig1-figsupp1-data2.xlsx]

## Sheet: hopkins_mean
F-FLAG	F-HA
0.71953	0.78292
0.70429	0.78196
0.74878	0.80062
0.77084	0.79412
0.78786	0.77095
0.76831	0.79775
0.79305	0.79346
0.77287	0.80516
0.74873	0.80885
0.72077	0.80833
0.76441	0.80484
0.77393	0.79727
0.81783	0.76035
0.79501	0.77589
0.82736	0.74942
0.8378	0.80451
0.7335	0.68253
0.74596	0.726
0.77345	0.73343
0.78217	0.68755
0.70083	0.78095
0.69288	0.69677
0.69959	0.80898
0.68705	0.78754
0.7032	0.77789
0.70495	0.71996
0.76827	0.75707
0.76207	0.80625
0.75697	0.78554
0.76719	0.75733
0.74626	0.75903
0.78008	0.75998
0.8039	0.77267
0.76051	0.75385
0.75735
0.77228
Table Analyzed	hopkins_mean
Column B	F-HA
vs.	vs.
Column A	F-FLAG
Mann Whitney test
P value	0.0675
Exact or approximate P value?	Exact
P value summary	ns
Significantly different (P < 0.05)?	No
One- or two-tailed P value?	Two-tailed
Sum of ranks in column A	B	1122	1363
Mann-Whitney U	456
Difference between medians
Median of column A	0.7632	n=36
Median of column B	0.7794	n=34
Difference: Actual	0.01618
Difference: Hodges-Lehmann	0.01518
