# Supplementary material for: The nanoscale organization of the Nipah virus fusion protein informs new membrane fusion mechanisms
Source: eLife. 2025 Jan 2;13:RP97017. doi: 10.7554/eLife.97017 (PMC11695058; doi:10.7554/eLife.97017)
Supplement: Figure 1—figure supplement 1—source data 3. [file elife-97017-fig1-figsupp1-data3.xlsx]

## Sheet: NOTAG
	notag	notag	notag	WT	WT	WT	P3	P3	P3
6	4.74021	4.7496	4.67739	4.34225	4.46667	4.50713	1.78909	2.02119	2.11489
5	4.04691	4.00278	3.66962	4.08353	4.34522	4.36475	1.84595	1.91957	1.74601
4	3.29025	2.96411	2.17923	2.53349	2.36467	1.86962	1.95842	1.87025	1.8365
	notag	WT	P3
Best-fit values
Slope	0.9556	1.091	0.04333
Y-intercept	-0.9647	-1.804	1.684
X-intercept	1.009	1.653	-38.85
1/slope	1.046	0.9163	23.08
Std. Error
Slope	0.1362	0.2174	0.04812
Y-intercept	0.6902	1.101	0.2438
95% Confidence Intervals
Slope	0.6335 to 1.278	0.5774 to 1.605	-0.07045 to 0.1571
Y-intercept	-2.597 to 0.6673	-4.408 to 0.8003	1.107 to 2.260
X-intercept	-1.048 to 2.043	-1.374 to 2.771	#NAME?
Goodness of Fit
R squared	0.8755	0.7827	0.1038
Sy.x	0.3337	0.5325	0.1179
Is slope significantly non-zero?
F	49.21	25.21	0.811
DFn	DFd	1	7	1	7	1
P value	0.0002	0.0015	0.3978
Deviation from zero?	Significant	Significant	Not Significant
Equation	Y = 0.9556*X - 0.9647	Y = 1.091*X - 1.804	Y = 0.04333*X + 1.684
Data
Number of X values	9	9	9
Maximum number of Y replicates	3	3	3
Total number of values	9	9	9
Number of missing values	0	0	0
