# Supplementary material for: The nanoscale organization of the Nipah virus fusion protein informs new membrane fusion mechanisms
Source: eLife. 2025 Jan 2;13:RP97017. doi: 10.7554/eLife.97017 (PMC11695058; doi:10.7554/eLife.97017)
Supplement: Figure 1—figure supplement 2—source data 2. [file elife-97017-fig1-figsupp2-data2.xlsx]

## Sheet: Hokin's index_mean
PK13	Hela
0.70411	0.70683
0.7295	0.70651
0.7659	0.74041
0.79412	0.75512
0.79615	0.75359
0.80423	0.78925
0.71641	0.73022
0.73741	0.75723
0.72812	0.75831
0.70463	0.74772
0.68972	0.75334
0.74061	0.73269
0.74546	0.6636
0.63105	0.80424
0.7084	0.66927
0.69316	0.6923
0.69446	0.70587
0.7197	0.72095
0.70649	0.70391
0.67407	0.71583
0.74644	0.70587
0.73264	0.73717
0.71118	0.7033
0.74137	0.74163
0.75821	0.71879
0.76496	0.68318
0.72216	0.72443
0.77321	0.75138
0.73206	0.74604
0.6669	0.72243
0.71901	0.66812
0.77193	0.68924
0.75119	0.69091
0.70381	0.73042
0.68901	0.78979
0.68796	0.77096
0.69782	0.68567
0.6838	0.68045
Table Analyzed	Hokin's index_mean
Column B	Hela
vs.	vs.
Column A	PK13
Mann Whitney test
P value	0.9773
Exact or approximate P value?	Exact
P value summary	ns
Significantly different (P < 0.05)?	No
One- or two-tailed P value?	Two-tailed
Sum of ranks in column A,B	1460 , 1466
Mann-Whitney U	719
Difference between medians
Median of column A	0.7209, n=38
Median of column B	0.7234, n=38
Difference: Actual	0.0025
Difference: Hodges-Lehmann	7.5e-05

## Sheet: Percentage of localizations in 
PK13	Hela
68.5384	55.1531
65.5756	57.7695
54.3136	54.6152
54.321	49.555
57.6716	48.3465
35.5747	47.401
47.5402	45.9413
36.6118	49.6653
48.4978	48.6337
53.5117	57.1843
38.4833	58.8003
55.0202	45.2239
55.3799	55.2484
37.5874	56.9864
35.6178	61.4611
50.7271	41.6
61.3482	61.3788
60.4382	53.8017
57.6005	39.0923
61.5353	55.361
68.4424	45.888
62.2628	40.3001
60.4777	48.7154
63.4094	53.3457
64.8309	56.8267
61.8015	51.4778
56.6079	51.5564
56.8164	50.3791
52.2478	56.1966
61.7289	55.2164
63.1161	54.0388
57.0416	53.8895
51.8195	52.5879
57.7259	41.9699
58.2956	48.9011
54.3353	40.1533
48.183	43.5475
45.8768	43.091
60.4569	49.7372
58.6935	60.9
45.7751	61.6479
46.9902	47.1597
54.8266	52.6074
50.8985	56.5775
51.3198	57.2209
52.6949	45.788
46.2409	53.0449
42.5231	61.6122
45.5816	46.7886
40.4026	40.8284
53.3503	49.6269
57.9454	68.15
62.3782	68.2822
59.3952	60.7438
58.6461	72.9191
54.0866	67.9765
64.228	57.0718
61.8004	70.4305
47.4071	69.2677
49.0492	58.6621
52.7194	68.4419
50.2449	51.4545
58.7356	52.2457
61.2813	47.2606
42.0016	61.1065
50.5541	55.6711
60.1874	44.0906
48.0236	39.942
48.3264	49.4134
43.6456	58.8796
61.6459	56.1379
57.5402	50.6546
51.6908	54.584
61.0252	52.2938
60.3543	55.3283
63.1416	49.5868
61.3441	58.4169
61.6082	63.3611
63.4224	54.7709
58.3672	56.4882
64.404	58.3431
61.4734	50.0245
64.0968	57.2833
63.8095	59.5003
	68.712
	55.7232
	60.9631
	55.8245
	39.5991
	53.1267
Table Analyzed	Percentage of localizations in clusters
Column B	Hela
vs.	vs.
Column A	PK13
Mann Whitney test
P value	0.115
Exact or approximate P value?	Exact
P value summary	ns
Significantly different (P < 0.05)?	No
One- or two-tailed P value?	Two-tailed
Sum of ranks in column A,B	7874 , 7351
Mann-Whitney U	3256
Difference between medians
Median of column A	56.93, n=84
Median of column B	54.31, n=90
Difference: Actual	-2.618
Difference: Hodges-Lehmann	-1.984

## Sheet: Relative density
PK13	Hela
81.059	81.1933
93.0007	44.8777
57.311	57.9779
37.156	53.1187
90.4115	54.574
61.5639	67.6956
62.2062	56.1405
64.6648	51.0507
61.2811	56.4442
58.1062	51.3254
81.0526	48.2679
69.2191	55.0765
82.2363	48.4067
91.9406	66.7942
83.0694	45.9209
46.8411	46.4978
70.5809	51.0446
46.7459	67.4619
53.1225	54.9016
72.7514	107.17
70.8506	104.388
98.4414	114.895
50.7168	112.85
62.1066	114.664
64.6659	110.156
60.6902	143.246
64.3497	104.259
90.1951	60.1814
104.102	55.2484
106.208	44.658
105.42	62.6124
92.1387	107.323
86.0189	64.9087
73.3661	73.1171
107.506	58.9557
87.9494	55.0605
83.6068	52.6477
131.4	113.057
46.9346	72.8136
55.0633	70.5643
110.91	69.3409
50.9364	59.5972
43.8691	85.7906
65.5351	53.5164
83.5753	70.636
83.7474	54.52
91.0447	76.6073
73.9128	57.8934
70.9102	87.1275
102.827	121.851
121.851	99.4967
82.6985	85.7303
90.2665	90.2665
84.3048	91.0447
101.97	100.242
68.0224	102.827
74.1206	131.4
66.9491	113.55
100.631	88.8991
99.4967	89.4454
85.8824	83.9
72.7606	121
82.3024	99.4367
85.0555	59.9567
88.0286	121.699
99.6773	73.1971
54.8305	58.5148
57.7702	67.1174
53.1335	56.4528
72.1364	44.7223
66.6268	110.379
94.241	91.6011
60.3162	50.5168
61.9821	47.5904
113.55	116.78
97.9517	72.6194
96.323	47.6186
89.3598	49.4812
60.2956	89.4733
71.106	51.0139
78.2883	67.2815
119.949	58.2157
98.041
Table Analyzed	Relative density
Column B	Hela
vs.	vs.
Column A	PK13
Mann Whitney test
P value	0.1764
Exact or approximate P value?	Exact
P value summary	ns
Significantly different (P < 0.05)?	No
One- or two-tailed P value?	Two-tailed
Sum of ranks in column A,B	7305 , 6391
Mann-Whitney U	2988
Difference between medians
Median of column A	81.05, n=83
Median of column B	67.58, n=82
Difference: Actual	-13.47
Difference: Hodges-Lehmann	-5.115

## Sheet: Average cluster area (nm^2)
PK13	Hela						PK13	Hela
				Transform to cluster diaeter
2420.88	1601.83						27.7665	22.5862
2032.64	2043.93						25.4428	25.5134
1959.79	1659.27						24.9827	22.9876
2381.96	1633.05						27.5424	22.8052
2031.52	1894.37						25.4358	24.5622
1734.31	1834.99						23.5017	24.1742
1943.78	1621.86						24.8805	22.727
1852.47	1683						24.2891	23.1514
2238.01	1716.13						26.6972	23.3782
1894.44	2356.51						24.5627	27.3949
1301.37	1458.57						20.358	21.5526
2937.17	2081.34						30.5844	25.7458
2029.32	1761.32						25.422	23.684
2388.71	2699.24						27.5815	29.3195
1633.42	1768.62						22.8079	23.733
1929.91	2065.62						24.7916	25.6484
2159.42	2362.47						26.2243	27.4295
1862.69	1907.4						24.356	24.6466
2354.47	1498.47						27.383	21.8454
1904.51	1742.18						24.6279	23.5549
2637.86	1747.91						28.9842	23.5936
2440.58	1514.75						27.8793	21.9637
2068.02	1765.13						25.6633	23.7096
1855.96	1512.73						24.3119	21.949
2381.31	1663.39						27.5387	23.0161
2469.08	1776.09						28.0416	23.7831
2062.96	1929.07						25.6319	24.7861
1865.17	1841.31						24.3722	24.2158
1662.28	1507.21						23.0085	21.909
2045.74	2047.64						25.5247	25.5365
1879.95	1951.77						24.4686	24.9315
1832.99	1758.39						24.161	23.6642
2032.66	1820.14						25.4429	24.0762
2350.74	2057.05						27.3613	25.5952
1812.34	1635.79						24.0246	22.8244
1645.9	1422.82						22.8948	21.2868
2017.55	2268.02						25.3482	26.8756
2028.1	1707.47						25.4144	23.3191
1798.14	1693.33						23.9303	23.2223
1847.23	1767.69						24.2547	23.7267
1646.39	1709.65						22.8982	23.334
1774.18	1997.1						23.7703	25.2194
1614.67	1830.38						22.6766	24.1438
1728.7	1554.45						23.4636	22.2497
1638.44	1890.69						22.8429	24.5384
1449.31	1833.27						21.4841	24.1629
1473.92	1659.26						21.6657	22.9875
1207.92	1536.21						19.6135	22.1188
1478.09	1973.19						21.6963	25.068
1307.09	2133.51						20.4027	26.0665
1521.12	1488.24						22.0098	21.7706
2093.19	1466.67						25.819	21.6123
2254.07	2013.19						26.7929	25.3208
1740.12	2291.14						23.541	27.0123
1816.43	1887.21						24.0516	24.5157
1631.65	2254.73						22.7955	26.7968
1947.45	2268.24						24.904	26.8769
2126.16	1741.14						26.0216	23.5479
1801.71	2323.27						23.954	27.201
2191.68	2113.43						26.4195	25.9436
1709.93	1910.8						23.3359	24.6685
1796.45	1532.66						23.919	22.0932
1803.78	1786.56						23.9677	23.853
2019.65	2509.44						25.3614	28.2698
1210.22	2675.54						19.6322	29.1904
1956.29	2223.43						24.9604	26.6101
2167.16	1995.46						26.2712	25.2091
1747.65	1833.47						23.5919	24.1642
1897.89	1890.66						24.585	24.5382
1738.78	1468.23						23.532	21.6238
1969.85	1740.46						25.0468	23.5433
2095.03	2047.26						25.8303	25.5342
1621.68	1743.2						22.7257	23.5618
1772.38	1929.24						23.7582	24.7872
2196.86	1785.32						26.4506	23.8448
1909.55	1328.69						24.6604	20.5706
1660.31	1923.85						22.9948	24.7526
1974.7	2069.26						25.0776	25.671
1766.82	2233.63						23.7209	26.6711
1782.51	1861.02						23.826	24.3451
1752.99	1797						23.6279	23.9226
1624.44	1652.18						22.7451	22.9385
2004.39	1592.42						25.2654	22.5198
2150.29	1924.49						26.1688	24.7567
Table Analyzed	cluster diameter
Column B	Hela
vs.	vs.
Column A	PK13
Mann Whitney test
P value	0.1666
Exact or approximate P value?	Exact
P value summary	ns
Significantly different (P < 0.05)?	No
One- or two-tailed P value?	Two-tailed
Sum of ranks in column A,B	7535 , 6661
Mann-Whitney U	3091
Difference between medians
Median of column A	24.52, n=84
Median of column B	24.11, n=84
Difference: Actual	-0.4056
Difference: Hodges-Lehmann	-0.4057
