# Supplementary material for: The nanoscale organization of the Nipah virus fusion protein informs new membrane fusion mechanisms
Source: eLife. 2025 Jan 2;13:RP97017. doi: 10.7554/eLife.97017 (PMC11695058; doi:10.7554/eLife.97017)
Supplement: Figure 1—source data 5. [file elife-97017-fig1-data5.xlsx]

## Sheet: cluster diameter_1
NiV-F-FLAG
21.6102
22.2386
24.624
25.2708
23.1291
21.5132
21.3693
25.8477
24.8447
27.7118
22.2589
23.8637
26.7314
23.5992
24.9555
25.0407
26.5475
26.5349
24.0237
29.3416
30.0892
28.4679
28.7713
26.2255
22.9887
24.6231
27.3008
30.4207
25.0694
33.3949
27.5759
23.4802
24.858
23.6523
23.9349
25.6823
24.3746
27.3356
27.0426
25.6751
23.7798
26.8537
23.4049
24.0506
24.0742
24.8336
24.5039
20.6415
25.0972
23.7188
22.7681
24.3574
22.6901
22.9899
24.1597
23.7563
22.9815
25.2983
26.3589
24.8093
23.896
25.0688
26.4095
28.2308
27.3432
28.0944
28.8408
24.5085
21.7181
24.7745
27.5697
27.6915
23.9676
27.2907
27.0947
25.4376
24.8746
25.9459
26.8876
26.4155
24.3426
25.7849
24.9905
26.3823
19.1591
25.6117
29.1624
26.9502
27.0775
20.4517
27.883
25.4631
19.5498
26.9647
19.8343
20.7993
22.5827
24.7711
25.8462
22.6245
25.0329
25.9162
19.358
24.2019
23.9272
26.5095
24.3375
28.3415
26.8445
27.4273
25.0353
23.4223
25.1797
26.7125

## Sheet: density of clusters
low	high
101.169	31.6167
79.8961	45.2331
59.6162	44.6677
57.4918	40.5747
33.1246	69.0773
20.7313	61.208
78.1019	28.4734
55.9746	39.9181
66.3402	113.052
100.315	88.8179
32.9392	25.4478
33.6672	86.2674
54.3041	64.2017
54.0338	70.8831
62.5283	114.764
45.1369	75.0727
52.4844	124.412
69.4123	118.513
58.4632	113.626
68.187	191.048
79.8629	95.7119
50.5404	138.287
94.5156	108.216
82.3638	117.619
50.2992	116.143
51.7041	86.506
44.2789	99.9287
30.6219	150.025
59.3495	58.4632
72.3553	55.3327
70.4911	97.4327
79.7591	80.636
97.4372	59.0901
67.8507	53.5139
64.6817	141.651
72.255	87.473
41.431	108.929
54.3161	77.2893
62.4714	85.5289
80.8894	101.761
38.2934	101.75
38.7543	101.998
38.7069	81.0442
47.1623	95.316
42.7405	14.5796
41.8077	93.9966
41.416	108.677
36.7492	43.6211
38.4667	62.1171
37.9806	26.6062
48.4007	49.4313
40.3513	60.7979
37.1598	18.6676
57.3106	64.0544
50.9178	43.282
47.415	50.7018
53.8844	67.0844
41.5034	82.1212
55.8512	74.7116
	64.4126
	48.9182
	29.3699
	18.3907
	72.255
	62.2621
	78.335
	58.4637
	92.5192
	102.783
	144.609
	58.9066
	61.1803
	74.3722
	130.573
Table Analyzed	density of clusters
Column B	High
vs.	vs.
Column A	Low
Mann Whitney test
P value	<0.0001
Exact or approximate P value?	Exact
P value summary	****
Significantly different (P < 0.05)?	Yes
One- or two-tailed P value?	Two-tailed
Sum of ranks in column A,B	3054 , 5857
Mann-Whitney U	1284
Difference between medians
Median of column A	54.03, n=59
Median of column B	74.89, n=74
Difference: Actual	20.86
Difference: Hodges-Lehmann	20.44

## Sheet: Hopkin's index
	Low	High
	0.85661	0.76342
	0.83011	0.72669
	0.85619	0.7
	0.85009	0.82869
	0.87237	0.7481
	0.86282	0.86077
	0.86266	0.79845
	0.84144	0.79432
	0.87431	0.80896
	0.87546	0.71754
	0.8802	0.70371
	0.85681	0.7041
	0.84696	0.7519
	0.81693	0.75455
	0.83818	0.73242
	0.88042	0.75479
	0.8934	0.82864
	0.87373	0.89052
	0.84695	0.88674
	0.86406	0.90379
	0.85094	0.90062
	0.88199	0.91423
	0.8728	0.85104
	0.80235	0.8151
	0.7885	0.77099
	0.71716	0.86949
	0.75464	0.86569
	0.80472	0.84137
	0.76819	0.85059
	0.78487	0.82182
	0.83583	0.89533
	0.811	0.8876
	0.83756	0.91089
	0.84574	0.90243
	0.84048	0.84732
		0.85635
		0.81292
		0.79346
		0.81677
		0.85776
		0.83083

## Sheet: cluster diameter_2
	Low	High
	30.0892	21.6102
	28.4679	22.2386
	28.7713	24.624
	26.2255	25.2708
	22.9887	23.1291
	24.6231	21.5132
	27.3008	21.3693
	30.4207	25.8477
	25.0694	24.8447
	33.3949	27.7118
	27.5759	22.2589
	23.4802	23.8637
	24.858	26.7314
	23.6523	23.5992
	23.9349	24.9555
	25.6823	25.0407
	24.3746	26.5475
	27.3356	26.5349
	27.0426	24.0237
	25.6751	29.3416
	23.7798	21.7181
	26.8537	24.7745
	23.4049	27.5697
	24.0506	27.6915
	24.0742	23.9676
	24.8336	27.2907
	24.5039	27.0947
	20.6415	25.4376
	25.0972	24.8746
	23.7188	25.9459
	22.7681	26.8876
	24.3574	26.4155
	22.6901	24.3426
	22.9899	25.7849
	24.1597	24.9905
	23.7563	26.3823
	22.9815	19.1591
	25.2983	25.6117
	26.3589	29.1624
	24.8093	26.9502
	23.896	27.0775
	25.0688	20.4517
	26.4095	27.883
	28.2308	25.4631
	27.3432	19.5498
	28.0944	26.9647
	28.8408	19.8343
	24.5085	20.7993
	23.9272	22.5827
	26.5095	24.7711
	24.3375	25.8462
	28.3415	22.6245
	26.8445	25.0329
	27.4273	25.9162
	25.0353	19.358
	23.4223	24.2019
	25.1797
	26.7125
Table Analyzed	cluster diameter
Column B	High
vs.	vs.
Column A	Low
Mann Whitney test
P value	0.2739
Exact or approximate P value?	Exact
P value summary	ns
Significantly different (P < 0.05)?	No
One- or two-tailed P value?	Two-tailed
Sum of ranks in column A,B	3529 , 3026
Mann-Whitney U	1430
Difference between medians
Median of column A	25.05, n=58
Median of column B	25.01, n=56
Difference: Actual	-0.04036
Difference: Hodges-Lehmann	-0.511

## Sheet: Absolute localization density i
	Low	High
	8541.32	11666.1
	10055.7	11953.6
	10893.3	14160.6
	10038.3	11099
	10787.2	10265.5
	10362	11150.9
	10768.4	10859.3
	12943	9740.28
	12595.2	10295.3
	11843.8	10286.1
	16497.5	12305
	13817.5	11096.6
	13873	10389.6
	14589.2	12407
	13698.7	13184
	13705	13052.4
	13240.3	11711.7
	13156.8	12496.6
	12107.1	11806.5
	14308.9	13649.3
	13244	11330.3
	9492.46	12314.6
	11167.4	12627.3
	10464.4	15788.9
	10278.8	14035.5
	10875.6	12128.2
	12453.9	12298.3
	12578.8	12573.2
	13553.8	13201.5
	12576.4	13917.2
	11475.4	15176.6
	12537.5	11864.3
	10811.1	13985.3
	11834.3	11936.6
	11279.2	8071.43
	11451.1	12436.8
	12520.2	11062.2
	8004.56	11394.8
	11183.9	8285.42
	11437	10875.6
	11308.4	9549.3
	11972.8	11936.6
	10755	9426.87
	9549.3	12777.4
	9482.98	12880.8
	11753	12624.9
	10831.4	10448.9
	11729	9688.56
	10617.3	10736.4
	11226.1	12207.3
	12817.7
	12040.4
	10395.9
	11317.7
	11907.1
	13217.3
	12075.9
	11936.6
Table Analyzed	Absolute localization density in cluster
Column B	High
vs.	vs.
Column A	Low
Mann Whitney test
P value	0.7602
Exact or approximate P value?	Exact
P value summary	ns
Significantly different (P < 0.05)?	No
One- or two-tailed P value?	Two-tailed
Sum of ranks in column A,B	3111 , 2775
Mann-Whitney U	1400
Difference between medians
Median of column A	11741, n=58
Median of column B	11937, n=50
Difference: Actual	195.6
Difference: Hodges-Lehmann	94.13
