# Supplementary material for: The nanoscale organization of the Nipah virus fusion protein informs new membrane fusion mechanisms
Source: eLife. 2025 Jan 2;13:RP97017. doi: 10.7554/eLife.97017 (PMC11695058; doi:10.7554/eLife.97017)
Supplement: Figure 2—figure supplement 1—source data 2. [file elife-97017-fig2-figsupp1-data2.xlsx]

## Sheet: fusion
NC	E64d
121.013	0
90.0563	0
109.756	0
78.7993	0
100.375	0
Table Analyzed	FUSION
Column B	E64d
vs.	vs.
Column A	NC
Unpaired t test with Welch's correction
P value	0.0002
P value summary	***
Significantly different (P < 0.05)?	Yes
One- or two-tailed P value?	Two-tailed
Welch-corrected t, df	t=13.58, df=4.000
How big is the difference?
Mean of column A	100
Mean of column B	0
Difference between means (B - A) ± SEM	-100.0 ± 7.366
95% confidence interval	-120.5 to -79.55
R squared (eta squared)	0.9788
F test to compare variances
F, DFn, Dfd	Infinity, 4, 4
P value	<0.0001
P value summary	****
Significantly different (P < 0.05)?	Yes
Data analyzed
Sample size, column A	5
Sample size, column B	5
