# Supplementary material for: The nanoscale organization of the Nipah virus fusion protein informs new membrane fusion mechanisms
Source: eLife. 2025 Jan 2;13:RP97017. doi: 10.7554/eLife.97017 (PMC11695058; doi:10.7554/eLife.97017)
Supplement: Figure 2—source data 2. [file elife-97017-fig2-data2.xlsx]

## Sheet: Hopkins
NC	E64d
0.74938	0.72684
0.7673	0.7431
0.73614	0.70144
0.73077	0.73125
0.71845	0.72923
0.7885	0.75811
0.76916	0.73138
0.80389	0.73203
0.77829	0.68776
0.7736	0.72888
0.76334	0.77833
0.76873	0.74753
0.74929	0.71264
0.76704	0.78004
0.75809	0.78413
0.78927	0.75421
0.80797	0.76782
0.7125	0.81452
0.78747	0.81876
0.75657	0.84958
0.68069	0.7058
0.72022	0.72942
0.72228	0.73999
0.72306	0.66299
0.72918	0.65813
0.76375	0.6865
0.80559	0.71529
0.78254	0.72445
0.74398	0.69758
0.78327	0.68708
0.66907	0.77446
0.72802	0.76585
0.70664	0.78535
0.73493	0.7575
0.73111	0.71294
0.76011	0.73784
0.74276	0.72102
0.73304	0.66566
0.67832	0.8043
0.70562	0.71203
Table Analyzed	Hopkins
Column B	E64d
vs.	vs.
Column A	NC
Mann Whitney test
P value	0.1774
Exact or approximate P value?	Exact
P value summary	ns
Significantly different (P < 0.05)?	No
One- or two-tailed P value?	Two-tailed
Sum of ranks in column A,B	1761 , 1479
Mann-Whitney U	659
Difference between medians
Median of column A	0.7493, n=40
Median of column B	0.7313, n=40
Difference: Actual	-0.01802
Difference: Hodges-Lehmann	-0.01199

## Sheet: Percentage of localizations in 
NC	E64d
75.5316	64.3893
77.6337	62.1641
77.2453	61.3911
76.5231	58.7079
75.4731	60.8502
70.8075	48.4911
70.8819	53.4299
64.4646	68.8466
68.555	64.1584
61.4435	68.0095
67.4757	70.3125
57.4109	60.4975
35.2439	67.6065
46.9912	51.6037
54.4133	64.7277
55.9701	60.1266
59.8594	66.9544
54.7903	56.654
51.6906	64.4558
67.3769	51.2871
69.1399	51.7946
67.5892	54.4814
69.3934	55.2007
70.5338	57.0941
63.9739	56.3401
67.5849	64.6569
68.5249	56.2923
66.1657	71.1966
69.1482	69.5122
66.0623	65.8246
59.2153	76.0549
59.2213	62.8975
54.428	71.6917
71.1414	63.6508
70.7452	74.279
73.8388	56.6054
60.4671	67.1782
62.699	72.7105
51.2788	53.7596
63.5326	76.4085
72.2569	77.0115
77.0238	74.0133
83.099	72.2335
71.3004	65.1442
66.2229	74.7243
63.3019	64.9581
55.3423	75.0652
59.1928	62.4498
65.1311	60.4176
56.0923	70.6539
58.9227	57.1737
53.0584	50.4392
51.083	50.1086
53.884	58.9798
52.2335	65.1247
56.8661	58.4046
58.8542	51.1155
68.3236	53.9947
68.483	50.556
61.3269	58.0801
62.398	54.4846
60.3715	59.3343
60.1336	64.7696
65.0071	54.8243
66.3585	62.485
67.7898	65.0328
63.4017	61.9799
48.8657	61.355
41.6585	59.4065
54.3916	56.6693
55.5779	60.2486
42.0151	75.7645
75.7152	74.3965
70.7711	78.2045
71.6698	75.5419
70.7819	73.4731
79.6606	74.2315
66.6353	64.5629
54.5147	65.3302
38.735	58.2845
68.8325	52.0809
50.2265	56.3223
60.1365	59.5496
60.8096	62.7175
72.1256	58.0451
61.0946	76.3758
68.7708	60.2925
54.7438	69.4227
70.2288	76.8894
64.313	76.7612
71.5205	58.7031
70.4981	60.2878
57.5996	56.2086
55.6879	57.8125
59.2323	51.3256
61.3586	64.2762
67.6534	67.222
57.0934	60.0077
64.4553	51.4896
63.0588	65.9984
53.5333	69.962
Table Analyzed	Percentage of localizations in clusters
Column B	E64d
vs.	vs.
Column A	NC
Mann Whitney test
P value	0.7343
Exact or approximate P value?	Approximate
P value summary	ns
Significantly different (P < 0.05)?	No
One- or two-tailed P value?	Two-tailed
Sum of ranks in column A,B	10393 , 10110
Mann-Whitney U	4959
Difference between medians
Median of column A	63.53, n=101
Median of column B	62.45, n=101
Difference: Actual	-1.083
Difference: Hodges-Lehmann	-0.4742

## Sheet: Relative density
NC	E64d
108.578	59.4862
99.4732	70.5748
72.7732	60.3042
70.4857	63.8572
79.1848	72.8203
86.076	66.2813
62.9603	83.4901
54.5881	67.8466
73.757	58.4271
71.2302	80.1301
109.135	133.774
90.9769	84.1429
64.779	46.8474
54.4788	91.9671
55.7636	63.168
49.9383	97.6338
52.65	68.2427
50.2442	78.1363
58.611	89.9805
105.425	87.116
100.044	61.1674
141.7	45.8314
133.855	90.0601
101.537	75.4622
53.6312	38.8665
135.512	68.7643
54.7729	67.2583
104.795	54.5665
61.3376	69.3875
69.795	72.6972
79.861	69.8105
70.9288	65.2417
57.9771	84.8145
80.7765	117.851
60.0145	105.168
104.776	58.2278
59.5979	82.0642
59.3402	52.6105
43.278	99.0398
68.5285	65.6443
67.411	126.698
94.6842	77.7284
92.5283	91.8262
107.012	71.3192
77.7868	84.19
87.6615	105.241
72.2725	106.581
69.4464	61.7635
100.834	121.806
34.0124	97.8012
53.5633	135.76
74.5301	95.4362
148.554	89.3617
70.988	60.2647
93.5397	59.8839
74.2296	55.9519
76.7628	62.5053
65.7086	66.1968
82.6601	64.5299
74.6536	49.798
95.3931	67.9641
114.176	67.3635
83.4302	77.0803
68.7438	63.7814
111.703	97.1984
43.5137	58.6934
46.8242	53.2559
40.9224	53.6724
55.2618	120.877
56.8057	73.1639
67.2103	97.7111
117.293	48.3419
133.345	47.6137
164.352	43.9865
75.9775	45.1631
99.5929	39.1625
54.2901	93.8345
42.1081	69.2301
45.3495	83.4491
77.7036	94.0953
59.0777	95.913
65.4109	76.8309
96.9623	99.2325
96.8366	84.5799
72.9205	108.75
64.8487	62.769
102.788	85.0553
103.107	84.9834
90.9005	91.3566
104.646	120.183
80.9945	77.5123
122.501	86.6957
76.8174	82.6517
64.5511	82.2776
154.781	74.9164
63.2172	104.028
100.415	75.6926
92.8262	68.7458
81.1491	85.1668
42.4468	83.1277
	73.9819
	66.8927
	70.1989
Table Analyzed	Relative density
Column B	E64d
vs.	vs.
Column A	NC
Mann Whitney test
P value	0.6878
Exact or approximate P value?	Exact
P value summary	ns
Significantly different (P < 0.05)?	No
One- or two-tailed P value?	Two-tailed
Sum of ranks in column A,B	10369 , 10337
Mann-Whitney U	4981
Difference between medians
Median of column A	74.59, n=100
Median of column B	74.92, n=103
Difference: Actual	0.3246
Difference: Hodges-Lehmann	-1.368

## Sheet: Cluster diameter (nm)
NC	E64d
27.697	25.9872
30.6115	28.5212
29.8842	25.9005
30.0914	24.221
29.9436	25.6496
26.5444	23.7063
26.9134	28.3189
28.4414	25.6158
29.1015	27.3743
28.4422	31.0448
26.7137	27.5268
24.7422	28.9821
22.7192	30.6381
26.3385	24.7206
25.9786	24.7692
24.7967	25.5362
24.9034	29.3959
27.4258	26.6539
28.695	27.2052
27.4639	24.2248
25.1526	28.6703
30.5115	25.1918
31.7767	23.097
27.9287	25.3173
29.7955	26.8346
28.1642	27.9839
26.7636	32.0068
31.0652	23.7343
27.5364	27.2274
24.4163	26.3724
25.9345	26.5771
24.2688	27.5799
28.6396	26.4056
27.3878	29.3166
29.2022	25.4596
25.1586	31.9564
27.1089	28.6643
23.8542	27.2667
25.2997	28.7203
30.3892	27.5392
30.1779	29.4021
32.5948	31.5352
26.0128	30.4167
27.0725	28.3979
27.2791	29.3666
26.3344	29.8121
25.4926	26.636
27.9552	28.0978
27.9066	29.567
24.6949	25.5452
25.6418	27.1077
24.7568	24.7057
25.1575	22.8294
23.4445	24.1454
24.7189	23.5196
29.1572	26.0306
25.5043	27.1724
27.6097	25.4629
24.1187	25.9029
27.6217	25.8154
24.6383	24.6992
23.5771	24.2058
25.6424	24.5793
27.0457	25.3906
24.5949	24.689
25.2896	26.3381
26.7198	25.0732
23.7814	24.879
25.2734	29.7211
26.4744	27.6817
24.2038	24.5057
29.2099	25.7798
28.0772	25.4329
28.5137	24.9866
30.2858	26.9204
32.6604	23.5087
26.3663	23.6026
24.0743	24.286
23.1783	33.3683
28.7408	29.3686
23.429	32.7802
23.5989	31.5883
24.243	33.201
27.7788	28.8354
28.1156	29.0777
30.0044	28.1545
24.5811	24.5363
29.6705	23.0913
27.0983	25.803
30.3725	23.8206
29.9305	24.1664
26.8269	24.913
26.1214	27.1652
26.8289	26.8142
26.4738	24.6613
25.306	29.4528
23.9618	27.193
26.3814	27.0436
26.348	25.5714
29.4298	25.3571
	25.3109
Table Analyzed	Cluster diameter (nm)
Column B	E64d
vs.	vs.
Column A	NC
Mann Whitney test
P value	0.5769
Exact or approximate P value?	Exact
P value summary	ns
Significantly different (P < 0.05)?	No
One- or two-tailed P value?	Two-tailed
Sum of ranks in column A,B	10331 , 9970
Mann-Whitney U	4819
Difference between medians
Median of column A	26.80, n=100
Median of column B	26.41, n=101
Difference: Actual	-0.3897
Difference: Hodges-Lehmann	-0.1986

## Sheet: Total density
NC	E64d
0.975
1.069	1.073
1.535	1.072
1.426	1.055
1.117	1.139
0.896	0.934
1.456	0.755
1.36	0.703
1.156	1.478
0.827	1.312
0.764	1.146
0.603	0.557
0.691	0.646
0.97	1.229
0.811	0.827
1.115	0.673
1.18	0.668
1.109	0.807
0.964	1.085
0.629	0.782
0.718	0.983
0.674	0.981
0.616	1.533
0.807	0.7
1.321	0.751
1.156	1.377
1.404	0.931
0.966	0.851
1.158	1.122
1.198	0.84
0.803	1.077
0.755	0.83
0.92	1.359
0.908	0.835
1.431	0.569
0.777	1.151
0.981	1.278
1.223	0.953
1.083	1.164
0.85	1.064
1.268	0.875
1.473	0.608
1.437	1.172
0.925	0.7
0.893	1.379
1.094	1.058
0.721	1.042
0.832	1.023
0.836	1.109
1.502	0.769
0.986	0.803
0.85	0.651
0.622	0.705
0.594	0.711
0.696	0.839
0.615	1.285
0.934	0.916
1.212	0.663
1.179	0.94
0.857	1.378
1.132	1.078
0.597	1.456
0.559	0.748
0.796	0.919
1.012	0.724
0.726	0.932
1.53	0.777
1.221	0.784
1.216	0.699
1.28	0.958
1.03	1.119
0.74	0.919
1.068	1.294
0.743	0.986
0.598	0.624
1.31	0.947
1.455	0.714
1.321	1.338
1.304	1.282
1.011	1.296
1.044	1.527
0.714	1.525
1.044	1.288
0.601	1.375
0.957	1.436
0.967	1.16
1.392	1.499
0.715	1.472
0.897	0.939
0.813	1.116
0.931	1.448
0.968	0.877
0.739	0.864
0.997	0.63
0.974	0.742
0.823	1.119
1.208	1.298
0.599	0.605
0.662	1.113
0.865	1.242
1.298	1.363
	0.774
	1.383
Table Analyzed	Transform of Total density *10^3 um2
Column B	E64d
vs.	vs.
Column A	NC
Mann Whitney test
P value	0.5439
Exact or approximate P value?	Approximate
P value summary	ns
Significantly different (P < 0.05)?	No
One- or two-tailed P value?	Two-tailed
Sum of ranks in column A,B	10048 , 10659
Mann-Whitney U	4897
Difference between medians
Median of column A	0.9670, n=101
Median of column B	0.9820, n=102
Difference: Actual	0.015
Difference: Hodges-Lehmann	0.023
