# Supplementary material for: The nanoscale organization of the Nipah virus fusion protein informs new membrane fusion mechanisms
Source: eLife. 2025 Jan 2;13:RP97017. doi: 10.7554/eLife.97017 (PMC11695058; doi:10.7554/eLife.97017)
Supplement: Figure 3—figure supplement 1—source data 2. [file elife-97017-fig3-figsupp1-data2.xlsx]

## Sheet: Sheet1
NC	WT	L53D	V108D	Q393L
0	94.6667	0	1.3333	175.733
0	114.933	0	1.3333	163.2
0	90.4	0	1.3333	175.467
0	86.1333	0	0	120
0	113.867	0	0	106.667
Table Analyzed	cell-cell fusion					Table Analyzed	cell-cell fusion					Table Analyzed	cell-cell fusion
Column C	L53D					Column D	V108D					Column E	Q393L
vs.	vs.					vs.	vs.					vs.	vs.
Column B	WT					Column B	WT					Column B	WT
Unpaired t test with Welch's correction						Unpaired t test with Welch's correction						Unpaired t test with Welch's correction
P value	<0.0001					P value	<0.0001					P value	0.0259
P value summary	****					P value summary	****					P value summary	*
Significantly different (P < 0.05)?	Yes					Significantly different (P < 0.05)?	Yes					Significantly different (P < 0.05)?	Yes
One- or two-tailed P value?	Two-tailed					One- or two-tailed P value?	Two-tailed					One- or two-tailed P value?	Two-tailed
Welch-corrected t, df	t=16.57, df=4.000					Welch-corrected t, df	t=16.42, df=4.023					Welch-corrected t, df	t=3.057, df=5.333
How big is the difference?						How big is the difference?						How big is the difference?
Mean of column B	100					Mean of column B	100					Mean of column B	100
Mean of column C	0					Mean of column D	0.8					Mean of column E	148.2
Difference between means (C - B) ± SEM	-100.0 ± 6.034					Difference between means (D - B) ± SEM	-99.20 ± 6.043					Difference between means (E - B) ± SEM	48.21 ± 15.77
95% confidence interval	-116.8 to -83.25					95% confidence interval	-115.9 to -82.46					95% confidence interval	8.419 to 88.01
R squared (eta squared)	0.9856					R squared (eta squared)	0.9853					R squared (eta squared)	0.6367
F test to compare variances						F test to compare variances						F test to compare variances
F, DFn, Dfd	Infinity, 4, 4					F, DFn, Dfd	341.4, 4, 4					F, DFn, Dfd	5.832, 4, 4
P value	<0.0001					P value	<0.0001					P value	0.116
P value summary	****					P value summary	****					P value summary	ns
Significantly different (P < 0.05)?	Yes					Significantly different (P < 0.05)?	Yes					Significantly different (P < 0.05)?	No
Data analyzed						Data analyzed						Data analyzed
Sample size, column B	5					Sample size, column B	5					Sample size, column B	5
Sample size, column C	5					Sample size, column D	5					Sample size, column E	5
