# Supplementary material for: The nanoscale organization of the Nipah virus fusion protein informs new membrane fusion mechanisms
Source: eLife. 2025 Jan 2;13:RP97017. doi: 10.7554/eLife.97017 (PMC11695058; doi:10.7554/eLife.97017)
Supplement: Figure 3—figure supplement 1—source data 3. [file elife-97017-fig3-figsupp1-data3.xlsx]

## Sheet: Sheet1
NC	WT	L53D	V108D	Q393L
0.079379	1.10127	1.03389	0.896693	1.02287
0.079134	0.919967	0.880768	0.863618	0.813393
0.079134	0.978767	0.977542	0.786443	1.00694
Table Analyzed	Data 1					Table Analyzed	Data 1				Table Analyzed	Data 1				Table Analyzed	Data 1
Column B	WT					Column C	L53D				Column D	V108D				Column E	Q393L
vs.	vs.					vs.	vs.				vs.	vs.				vs.	vs.
Column A	NC					Column B	WT				Column B	WT				Column B	WT
Unpaired t test with Welch's correction						Unpaired t test with Welch's correction					Unpaired t test with Welch's correction					Unpaired t test with Welch's correction
P value	0.0033					P value	0.6339				P value	0.0866				P value	0.5775
P value summary	**					P value summary	ns				P value summary	ns				P value summary	ns
Significantly different (P < 0.05)?	Yes					Significantly different (P < 0.05)?	No				Significantly different (P < 0.05)?	No				Significantly different (P < 0.05)?	No
One- or two-tailed P value?	Two-tailed					One- or two-tailed P value?	Two-tailed				One- or two-tailed P value?	Two-tailed				One- or two-tailed P value?	Two-tailed
Welch-corrected t, df	t=17.24, df=2.000					Welch-corrected t, df	t=0.5159, df=3.880				Welch-corrected t, df	t=2.413, df=3.313				Welch-corrected t, df	t=0.6082, df=3.803
How big is the difference?						How big is the difference?					How big is the difference?					How big is the difference?
Mean of column A	0.07922					Mean of column B	1				Mean of column B	1				Mean of column B	1
Mean of column B	1					Mean of column C	0.9641				Mean of column D	0.8489				Mean of column E	0.9477
Difference between means (B - A) ± SEM	0.9208 ± 0.05340					Difference between means (C - B) ± SEM	-0.03593 ± 0.06965				Difference between means (D - B) ± SEM	-0.1511 ± 0.06260				Difference between means (E - B) ± SEM	-0.05227 ± 0.08594
95% confidence interval	0.6910 to 1.151					95% confidence interval	-0.2317 to 0.1598				95% confidence interval	-0.3401 to 0.03791				95% confidence interval	-0.2958 to 0.1913
R squared (eta squared)	0.9933					R squared (eta squared)	0.06419				R squared (eta squared)	0.6375				R squared (eta squared)	0.08865
F test to compare variances						F test to compare variances					F test to compare variances					F test to compare variances
F, DFn, Dfd	427595, 2, 2					F, DFn, Dfd	1.426, 2, 2				F, DFn, Dfd	2.673, 2, 2				F, DFn, Dfd	1.590, 2, 2
P value	<0.0001					P value	0.8243				P value	0.5445				P value	0.7723
P value summary	****					P value summary	ns				P value summary	ns				P value summary	ns
Significantly different (P < 0.05)?	Yes					Significantly different (P < 0.05)?	No				Significantly different (P < 0.05)?	No				Significantly different (P < 0.05)?	No
Data analyzed						Data analyzed					Data analyzed					Data analyzed
Sample size, column A	3					Sample size, column B	3				Sample size, column B	3				Sample size, column B	3
Sample size, column B	3					Sample size, column C	3				Sample size, column D	3				Sample size, column E	3
