# Supplementary material for: The nanoscale organization of the Nipah virus fusion protein informs new membrane fusion mechanisms
Source: eLife. 2025 Jan 2;13:RP97017. doi: 10.7554/eLife.97017 (PMC11695058; doi:10.7554/eLife.97017)
Supplement: Figure 3—figure supplement 1—source data 6. [file elife-97017-fig3-figsupp1-data6.xlsx]

## Sheet: Sheet1
	L53D			WT			P3
6	2.87801	2.54846	2.89909	4.20666	4.29508	4.20996	1.82731	1.8056	1.77354
5	1.8672	1.78081	2.76018	3.57053	3.33525	3.63621	1.75662	1.8809	1.63691
4	1.80383	1.7463	1.87161	2.00807	2.41184	1.93781	1.90492	1.76174	1.76959
	V108D			WT			P3
6	3.53026	3.98433	4.02214	4.20666	4.29508	4.20996	1.82731	1.8056	1.77354
5	2.93111	2.72147	2.95993	3.57053	3.33525	3.63621	1.75662	1.8809	1.63691
4	1.61704	2.85758	1.78124	2.00807	2.41184	1.93781	1.90492	1.76174	1.76959
	Q393L			WT			P3
6	5.12845	5.18215	5.29471	4.20666	4.29508	4.20996	1.82731	1.8056	1.77354
5	4.70525	4.80663	4.81774	3.57053	3.33525	3.63621	1.75662	1.8809	1.63691
4	3.42211	3.77872	3.70039	2.00807	2.41184	1.93781	1.90492	1.76174	1.76959
	L53D	WT	P3				V108D	WT	P3			Q393L	WT	P3
Best-fit values
Slope	0.484	1.059	-0.004968				0.8801	1.059	-0.004968			0.784	1.059	-0.004968
Y-intercept	-0.1803	-2.005	1.816				-1.467	-2.005	1.816			0.6173	-2.005	1.816
X-intercept	0.3726	1.893	365.5				1.667	1.893	365.5			-0.7873	1.893	365.5
1/slope	2.066	0.9443	-201.3				1.136	0.9443	-201.3			1.275	0.9443	-201.3
Std. Error
Slope	0.1311	0.09898	0.03415				0.1626	0.09898	0.03415			0.09126	0.09898	0.03415
Y-intercept	0.6639	0.5015	0.173				0.8235	0.5015	0.173			0.4623	0.5015	0.173
95% Confidence Intervals
Slope	0.1741 to 0.7939	0.8249 to 1.293	-0.08573 to 0.07579				0.4958 to 1.265	0.8249 to 1.293	-0.08573 to 0.07579			0.5682 to 0.9998	0.8249 to 1.293	-0.08573 to 0.07579
Y-intercept	-1.750 to 1.390	-3.191 to -0.8191	1.406 to 2.225				-3.414 to 0.4805	-3.191 to -0.8191	1.406 to 2.225			-0.4760 to 1.711	-3.191 to -0.8191	1.406 to 2.225
X-intercept	-7.911 to 2.225	0.9883 to 2.479	25.87 to +infinity				-0.9610 to 2.723	0.9883 to 2.479	25.87 to +infinity			-3.001 to 0.4776	0.9883 to 2.479	25.87 to +infinity
Goodness of Fit
R squared	0.6608	0.9424	0.003014				0.8073	0.9424	0.003014			0.9134	0.9424	0.003014
Sy.x	0.321	0.2424	0.08366				0.3982	0.2424	0.08366			0.2235	0.2424	0.08366
Is slope significantly non-zero?
F	13.64	114.5	0.02116				29.32	114.5	0.02116			73.81	114.5	0.02116
DFn, DFd	1, 7	1, 7	1, 7				1, 7	1, 7	1, 7			1, 7	1, 7	1, 7
P value	0.0077	<0.0001	0.8884				0.001	<0.0001	0.8884			<0.0001	<0.0001	0.8884
Deviation from zero?	Significant	Significant	Not Significant				Significant	Significant	Not Significant			Significant	Significant	Not Significant
Equation	Y = 0.4840*X - 0.1803	Y = 1.059*X - 2.005	Y = -0.004968*X + 1.816				Y = 0.8801*X - 1.467	Y = 1.059*X - 2.005	Y = -0.004968*X + 1.816			Y = 0.7840*X + 0.6173	Y = 1.059*X - 2.005	Y = -0.004968*X + 1.816
Data
Number of X values	9	9	9				9	9	9			9	9	9
Maximum number of Y replicates	3	3	3				3	3	3			3	3	3
Total number of values	9	9	9				9	9	9			9	9	9
Number of missing values	0	0	0				0	0	0			0	0	0
