# Supplementary material for: The nanoscale organization of the Nipah virus fusion protein informs new membrane fusion mechanisms
Source: eLife. 2025 Jan 2;13:RP97017. doi: 10.7554/eLife.97017 (PMC11695058; doi:10.7554/eLife.97017)
Supplement: Figure 3—figure supplement 1—source data 9. [file elife-97017-fig3-figsupp1-data9.xlsx]

## Sheet: Sheet1
Time(min)	WT	L53D	V108D	Q393L
0	-1	-3	-1	-2
3	-1	-2	-1	-2
6	0	-2	0	-1
9	0	-1	-1	-1
12	0	-1	-1	0
15	0	-1	-1	-1
18	0	-1	-1	0
21	0	-1	-1	0
24	0	-1	-1	0
27	1	0	-1	0
30	1	-1	-1	0
33	1	-1	-1	1
36	1	-1	-1	0
39	1	-1	-1	1
42	1	-1	-1	1
45	1	-1	-1	1
48	1	-1	-1	2
51	1	-1	-1	2
54	2	-1	-1	3
57	2	-1	-1	4
60	3	-1	-1	4
63	3	-1	-1	5
66	4	-1	0	7
69	4	-2	-2	8
72	5	-1	-1	9
75	6	-1	-1	11
78	6	-2	-1	11
81	8	-2	-1	13
84	9	-1	-1	16
87	9	-2	-1	17
90	10	-2	-1	19
93	11	-2	-1	21
96	12	-2	-1	23
99	13	-1	0	25
102	14	-2	-1	27
105	15	-2	0	30
108	16	-2	-1	30
111	17	-2	-1	33
114	19	-2	0	36
117	19	-2	0	37
120	20	-2	0	39
123	21	-2	0	41
126	23	-3	-1	43
129	23	-2	-1	45
132	25	-2	0	48
135	26	-2	0	50
138	27	-2	0	52
141	28	-2	-1	53
144	29	-2	0	57
147	29	-3	-1	57
150	31	-2	0	60
153	32	-2	0	63
156	33	-2	0	65
159	34	-3	-1	66
162	35	-2	0	69
165	37	-2	1	71
168	38	-2	1	74
171	39	-2	1	76
174	40	-2	1	78
177	41	-3	0	79
180	42	-2	1	82
183	43	-3	0	83
186	44	-3	0	85
189	46	-3	0	88
192	47	-3	1	91
195	48	-3	0	93
198	50	-2	1	95
201	51	-2	1	97
204	52	-3	1	99
207	53	-3	1	102
210	54	-2	1	104
213	56	0	3	107
216	57	-4	0	108
219	58	-3	2	110
222	59	-2	2	112
225	61	-3	2	114
228	63	-3	2	117
231	64	-2	2	119
234	65	-3	2	120
237	67	-3	2	122
