# Supplementary material for: The nanoscale organization of the Nipah virus fusion protein informs new membrane fusion mechanisms
Source: eLife. 2025 Jan 2;13:RP97017. doi: 10.7554/eLife.97017 (PMC11695058; doi:10.7554/eLife.97017)
Supplement: Figure 3—source data 2. [file elife-97017-fig3-data2.xlsx]

## Sheet: Sheet1
L53D	V108D	Q393L	WT
0.7874	0.77787	0.79938	0.85661
0.74909	0.75845	0.86548	0.83011
0.79884	0.79301	0.85664	0.85619
0.77576	0.77271	0.86005	0.85009
0.78343	0.78336	0.86561	0.87237
0.82947	0.77026	0.82477	0.86282
0.81141	0.75204	0.8881	0.86266
0.77676	0.76441	0.87518	0.84144
0.78695	0.78367	0.88668	0.87431
0.79792	0.71796	0.88742	0.87546
0.74046	0.8704	0.86997	0.8802
0.75133	0.84318	0.8023	0.85681
0.733	0.85777	0.80935	0.84696
0.74458	0.86694	0.88439	0.81693
0.77548	0.86974	0.88677	0.83818
0.7661	0.88205	0.87391	0.88042
0.78301	0.86216	0.86033	0.8934
0.80727	0.87995	0.86713	0.87373
0.81088	0.85356	0.87642	0.84695
0.79383	0.78262	0.8392	0.86406
0.79148	0.78414	0.8559	0.85094
0.81122	0.79948	0.8264	0.88199
0.78321	0.78687	0.84262	0.8728
0.77958	0.77535	0.86519	0.80235
0.80368	0.79182	0.85716	0.7885
0.78824	0.75326	0.84674	0.75464
0.7795	0.78044	0.86855	0.80472
0.76484	0.72378	0.87312	0.76819
0.77107	0.82826	0.88737	0.78487
0.81182	0.8826	0.87828	0.83583
0.82129	0.89084	0.84858	0.811
0.82493	0.85715	0.8399	0.83756
0.80621	0.88414	0.86693	0.84574
0.7834	0.889	0.80299	0.84048
0.8453	0.8485	0.81499	0.76342
0.82776	0.85052	0.86062	0.82869
0.81509	0.86437	0.86161	0.7481
0.84082	0.86229	0.84895	0.86077
0.82444	0.81092	0.86301	0.79845
0.8335	0.84385	0.85321	0.79432
0.80688	0.86459	0.87862	0.80896
0.81418	0.82042	0.88735	0.7519
0.84219	0.79516	0.85302	0.75455
0.84136	0.82381	0.88731	0.73242
0.85758	0.80466	0.87496	0.75479
0.83683	0.80021	0.83206	0.82864
0.81505	0.80489	0.80455	0.89052
0.74111	0.7848	0.80688	0.88674
0.80147	0.80553	0.87123	0.90379
0.81234	0.79138	0.87468	0.90062
0.8582	0.80741	0.87292	0.91423
0.87522	0.8042	0.8768	0.85104
0.8247	0.75625	0.8682	0.8151
0.87044	0.79951	0.88131	0.77099
0.89757	0.76769	0.85134	0.86949
0.88692	0.77915	0.8139	0.86569
0.88411	0.78783	0.80539	0.84137
0.88034		0.87243	0.85059
0.89193		0.84207	0.82182
0.89943		0.85981	0.89533
0.88953		0.8477	0.8876
0.87222		0.84702	0.91089
0.85512		0.87664	0.90243
0.88103		0.86078	0.84732
0.88531		0.86045	0.85635
0.88504		0.86118	0.81292
		0.82746	0.79346
		0.80914	0.81677
		0.81427	0.85776
		0.81664	0.83083
		0.81936
		0.83786
		0.88611
		0.84694
		0.84738
Table Analyzed	Hopkins index mean				Table Analyzed	Hopkins index mean				Table Analyzed	Hopkins index mean
Column D	WT				Column D	WT				Column D	WT
vs.	vs.				vs.	vs.				vs.	vs.
Column A	L53D				Column B	V108D				Column C	Q393L
Mann Whitney test					Mann Whitney test					Mann Whitney test
P value	0.0034				P value	0.0029				P value	0.0448
Exact or approximate P value?	Exact				Exact or approximate P value?	Exact				Exact or approximate P value?	Exact
P value summary	**				P value summary	**				P value summary	*
Significantly different (P < 0.05)?	Yes				Significantly different (P < 0.05)?	Yes				Significantly different (P < 0.05)?	Yes
One- or two-tailed P value?	Two-tailed				One- or two-tailed P value?	Two-tailed				One- or two-tailed P value?	Two-tailed
Sum of ranks in column A,D	3853 , 5463				Sum of ranks in column B,D	3038 , 5090				Sum of ranks in column C,D	5982 , 4603
Mann-Whitney U	1642				Mann-Whitney U	1385				Mann-Whitney U	2118
Difference between medians					Difference between medians					Difference between medians
Median of column A	0.8116, n=66				Median of column B	0.8042, n=57				Median of column C	0.8603, n=75
Median of column D	0.8470, n=70				Median of column D	0.8470, n=70				Median of column D	0.8470, n=70
Difference: Actual	0.03534				Difference: Actual	0.04276				Difference: Actual	-0.01338
Difference: Hodges-Lehmann	0.02526				Difference: Hodges-Lehmann	0.02852				Difference: Hodges-Lehmann	-0.01162
