# Supplementary material for: The nanoscale organization of the Nipah virus fusion protein informs new membrane fusion mechanisms
Source: eLife. 2025 Jan 2;13:RP97017. doi: 10.7554/eLife.97017 (PMC11695058; doi:10.7554/eLife.97017)
Supplement: Figure 3—source data 3. [file elife-97017-fig3-data3.xlsx]

## Sheet: Percentage of localizations  in
WT	L53D	V108D	Q393L
69.5793	59.9806	25.3764	35.8439
76.8509	56.2756	32.5954	41.9016
85.5293	52.1043	32.9294	46.6586
89.2296	52.7289	36.8657	50.7765
85.898	48.7161	37.4194	39.0663			Table Analyzed	Percentage of localizations in clusters					Table Analyzed	Percentage of localizations in clusters				Table Analyzed	Percentage of localizations in clusters
88.91	41.51	48.8587	39.6552
86.0288	50.3253	58.2174	65.4435			Column B	L53D					Column C	V108D				Column D	Q393L
92.4214	59.8092	60.8417	65.4964			vs.	vs.					vs.	vs.				vs.	vs.
91.5456	57.6637	27.1102	62.5063			Column A	WT					Column A	WT				Column A	WT
89.2891	63.1321	47.2099	69.395
81.9603	52.1036	34.1696	50.2442			Mann Whitney test						Mann Whitney test					Mann Whitney test
74.5463	44.8669	21.3849	48.4615			P value	<0.0001					P value	<0.0001				P value	0.988
73.9671	42.8932	48.6325	59.9005			Exact or approximate P value?	Approximate					Exact or approximate P value?	Approximate				Exact or approximate P value?	Approximate
62.7057	46.0467	29.4118	60.3314			P value summary	****					P value summary	****				P value summary	ns
87.4715	34.5295	24.7191	60.607			Significantly different (P < 0.05)?	Yes					Significantly different (P < 0.05)?	Yes				Significantly different (P < 0.05)?	No
91.1851	34.1216	30.5898	51.4539			One- or two-tailed P value?	Two-tailed					One- or two-tailed P value?	Two-tailed				One- or two-tailed P value?	Two-tailed
88.1049	35.8385	35.5316	51.4037			Sum of ranks in column A,B	35964 , 11622					Sum of ranks in column A,C	42775 , 23291				Sum of ranks in column A,D	30207 , 16154
89.597	49.2537	44.995	47.0723			Mann-Whitney U	5517					Mann-Whitney U	9596				Mann-Whitney U	10483
78.704	43.3711	61.2253	65.5117
81.9603	49.357	56.3462	63.8016			Difference between medians						Difference between medians					Difference between medians
29.761	43.1362	29.073	89.2429			Median of column A	60.13, n=198					Median of column A	60.13, n=198				Median of column A	60.13, n=198
34.3529	49.136	34.4649	89.0288			Median of column B	44.72, n=110					Median of column C	50.22, n=165				Median of column D	59.96, n=106
42.9166	54.6137	34.0875	89.6143			Difference: Actual	-15.41					Difference: Actual	-9.915				Difference: Actual	-0.1709
28.5363	49.925	35.8742	92.4022			Difference: Hodges-Lehmann	-13.64					Difference: Hodges-Lehmann	-10.22				Difference: Hodges-Lehmann	-0.01443
32.5037	45.9953	42.5464	90.7643
32.3982	40.1866	48.3261	91.2923
19.6288	49.3238	43.0439	92.7861
26.1701	56.7476	58.4418	77.4274
54.255	55.4022	66.3725	93.4667
61.2125	48.0263	55.5901	35.0148
22.5947	53.3129	58.4869	23.5077
33.9152	49.8772	51.7274	54.8611
29.891	50.281	54.8049	56.6682
36.2525	29.3923	68.421	66.0191
51.3038	43.6327	45.3878	71.9249
50.0578	49.9668	56.6031	66.1693
63.1237	46.7472	54.2501	72.7094
60.6241	40.5586	53.7908	64.1104
55.4379	49.529	64.3704	71.4735
69.6984	37.7322	51.0928	62.2844
75.3892	32.3804	47.0258	53.5734
67.4117	39.9042	59.0699	38.1295
66.1048	49.5601	39.3833	51.3004
68.8901	53.5542	57.6423	59.2182
59.7614	58.1967	33.5062	58.8774
46.1451	65.3217	39.3627	56.1863
68.6957	63.3429	44.2192	66.8154
67.7284	70.0576	46.46	62.2247
66.8571	72.3456	41.4203	62.6917
71.6872	67.6478	50.2065	68.552
53.2195	58.9952	57.2521	73.4085
48.2759	68.0513	58.5735	69.7544
56.0159	33.7855	54.1859	64.9603
54.7987	27.2131	58.1133	58.6846
61.1718	37.8296	53.8189	71.4131
56.6558	44.4772	49.5405	65.7987
57.9662	30.443	46.3562	60.0253
64.5756	14.4076	21.3291	71.0766
68.4894	37.4822	16.9024	64.0993
62.8338	34.4456	29.8489	50
58.6565	42.0673	26.7472	56.5497
55.0991	37.614	31.1625	51.6573
59.5772	44.5734	41.4419	40.7868
55.6511	48.2727	32.1153	53.4112
51.2828	44.0151	34.9951	45.9984
53.3017	47.4104	39.5935	46.5966
48.7681	59.2638	27.6212	69.6247
35.2919	63.3563	19.5122	69.9259
51.0183	62.9694	26.9197	64.7879
53.9823	66.7651	32.657	54.2067
57.6262	76.7871	31.7204	52.7424
60.6685	74.4347	26.5549	66.795
58.6437	70.5461	30.1728	73.589
47.8115	78.2134	46.047	55.3178
54.3522	71.8815	23.5398	68.2976
53.5585	78.4546	21.0888	67.9398
52.3132	68.2345	39.6409	64.4849
52.8107	32.0316	61.0104	66.0988
57.6762	40.7589	39.191	69.3933
61.523	21.1283	40.5319	65.7263
48.1716	28.332	28.3034	67.8881
63.9339	42.3765	30.7836	50.0571
46.4659	38.334	46.2323	58.454
63.1741	37.9126	33.888	65.0738
49.4367	37.6983	44.9041	68.3987
40.4355	31.0972	28.7536	39.6056
43.2404	36.196	49.8582	36.3257
71.1413	24.5942	58.2213	47.2716
66.8759	22.7784	34.4509	56.4175
69.9089	35.1566		44.7814
64.467	31.1603		41.5584
58.8976	35.7083		46.3037
67.6672	39.5278		53.411
55.0478	43.6266		60.2181
49.5309	49.3963		57.2957
65.3287	43.5756		55.1282
66.5863	48.6655		52.9123
71.6577	42.2321		58.2889
62.4662	38.4806		64.7341
63.6927	41.6461		48.5154
70.0137	43.3139		44.5704
64.837	43.4171		47.9009
68.6271	31.016		45.4986
60.8169	36.6007		59.5054
70.4935	31.1475		52.1057
44.6411	40.0266		66.0308
66.6474	38.9064
53.855	40.7639
61.2386	45.6553
52.233	45.4213
53.8236
64.002
64.845
76.3406
73.1496
41.0991
52.3323
59.525
52.8105
75.8156
58.1072
60.4855
55.7721
57.9982
73.1367
70.0175
72.3684
63.8604
61.5788
64.9745
66.1602
67.059
61.1484
65.0849
64.704
72.0395
63.3205
51.8621
59.2087
50
68.0127
59.112
45.2623
66.9414
67.5253
59.0345
50.5747
38.174
51.1311
63.5697
69.0667
57.9608
47.0762
62.9051
60.781
34.8848
60.9552
40.8707
30.3712
49.3757
54.5151
54.8835
51.4122
56.5643
62.8489
56.9947
71.2741
64.5083
66.6321
74.1992
73.5891
77.5799
67.9862
66.8612
62.9492
66.7457
65.0813
71.9263
35.8432
28.7972
44.597
59.6316
58.9586
35.5002
44.4755
22.7437
17.7606
52.1493
50.4817
54.9662
43.2906
55.7794
69.9959
59.7821
52.8797
45.93
58.2082
63.8687
		60.6104
		53.559
		59.8624
		64.8835
		60.9416
		63.5854
		69.1396
		71.6388
		62.2047
		63.9874
		54.8547
		57.2012
		64.619
		61.8985
		61.489
		65.1371
		67.2745
		67.1836
		68.7952
		58.2093
		53.8507
		64.9257
		61.4359
		62.667
		63.2131
		40.9043
		40.1961
		41.2102
		50.219
		51.4964
		52.4147
		61.6425
		66.535
		63.4412
		56.4406
		67.1795
		65.0082
		27.4224
		36.5983
		33.8476
		36.2808
		63.5946
		32.0664
		37.8886
		56.2315
		36.2628
		64.3403
		64.0317
		49.1515
		56.1651
		54.9141
		54.9223
		54.0701
		56.4427
		58.9031
		50.401
		60.8966
		62.0395
		62.1843
		55.2661
		59.6341
		29.2384
		33.0313
		47.7154
		46.0815
		56.1932
		50.985
		55.5605
		49.6787
		64.9065
		63.2555
		58.8754
		44.9563
		67.1878
		49.7392
		56.0279

## Sheet: Relative density
WT	L53D	V108D	Q393L
88.0525	54.231	50.5227	69.6072
71.7052	65.3227	64.6549	81.7237
65.4388	102.598	49.9571	46.7652
57.2014	45.2796	42.18	105.357		Table Analyzed	Relative density			Table Analyzed	Relative density			Table Analyzed	Relative density
54.3238	31.3025	42.7287	68.3199
106.228	28.5899	29.8278	80.5745		Column B	L53D			Column C	V108D			Column D	Q393L
57.8002	37.1577	30.4761	72.5864		vs.	vs.			vs.	vs.			vs.	vs.
47.348	36.9892	35.3514	58.4509		Column A	WT			Column A	WT			Column A	WT
46.0219	37.1249	35.0316	30.0854
42.7047	29.1534	72.2865	55.7603		Mann Whitney test				Mann Whitney test				Mann Whitney test
64.378	54.7968	46.1922	72.0264		P value	0.0015			P value	0.01			P value	0.2244
70.3882	76.6974	46.2939	65.6733		Exact or approximate P value?	Exact			Exact or approximate P value?	Approximate			Exact or approximate P value?	Approximate
86.5805	64.4778	53.6315	83.2505		P value summary	**			P value summary	**			P value summary	ns
65.9685	38.679	57.9537	118.607		Significantly different (P < 0.05)?	Yes			Significantly different (P < 0.05)?	Yes			Significantly different (P < 0.05)?	No
44.6894	35.8197	47.7394	102.515		One- or two-tailed P value?	Two-tailed			One- or two-tailed P value?	Two-tailed			One- or two-tailed P value?	Two-tailed
47.1503	31.1678	31.8532	100.135		Sum of ranks in column A,B	27964 , 10539			Sum of ranks in column A,C	32639 , 20336			Sum of ranks in column A,D	26818 , 16842
83.5956	42.4901	49.7929	68.8651		Mann-Whitney U	6444			Mann-Whitney U	10745			Mann-Whitney U	9240
68.2105	31.8885	23.9759	64.1719
55.0046	50.8832	33.4925	65.8282		Difference between medians				Difference between medians				Difference between medians
72.5124	40.655	81.636	120.031		Median of column A	54.95, n=187			Median of column A	54.95, n=187			Median of column A	54.95, n=187
71.0239	27.7246	59.6062	76.5281		Median of column B	48.27, n=90			Median of column C	51.27, n=138			Median of column D	59.13, n=108
73.1985	26.2877	79.0059	117.54		Difference: Actual	-6.682			Difference: Actual	-3.683			Difference: Actual	4.181
119.357	30.8446	60.466	50.1376		Difference: Hodges-Lehmann	-8.227			Difference: Hodges-Lehmann	-4.382			Difference: Hodges-Lehmann	2.789
36.8008	29.4921	102.809	58.1767
46.1972	37.5211	45.2401	50.8346
53.6243	38.0351	60.6661	47.698
54.8949	22.7889	42.5825	45.7026
38.0302	33.0987	42.225	50.5664
46.0118	29.7803	50.6685	50.1658
61.7199	23.7377	74.1676	62.0235
32.4691	35.4319	72.3042	78.8616
33.5297	29.6877	74.9624	79.1967
40.2565	90.6259	68.6346	126.259
32.6433	48.3009	69.5832	99.6729
42.0377	48.8909	47.3817	162.168
56.8304	57.5173	97.7699	115.059
38.6102	49.4333	83.918	89.0198
38.5237	45.2479	86.0574	66.6089
27.7805	67.2511	102.165	86.9471
47.3664	42.6394	73.329	59.0385
72.5871	30.6275	67.6857	45.3988
48.8325	33.5986	47.6583	41.8015
59.8139	26.107	63.1575	53.9909
95.7383	23.7877	80.3818	46.5124
75.9922	22.0358	53.5297	68.7353
75.9955	33.4211	40.2788	53.4371
84.3812	30.3192	41.6622	37.1107
66.875	35.9441	34.8444	44.942
56.5678	37.2496	61.8709	35.1156
64.158	42.8979	53.2565	38.2459
54.5609	94.6947	55.7125	33.7994
57.4419	96.0291	48.1285	47.4718
51.2536	102.206	54.1476	50.3717
85.8771	95.2094	53.9347	59.5134
63.7991	59.1782	35.6237	39.6515
115.21	117.668	39.8636	43.0532
73.7322	120.921	50.4043	44.4536
74.409	57.407	27.3054	51.5432
52.8652	50.2229	54.1855	35.0699
59.0619	59.0489	27.5894	38.3689
87.0861	60.2136	29.9181	37.4275
55.1656	65.0892	24.9142	59.2214
52.797	64.3882	32.6975	66.5884
64.9853	72.2638	39.6845	63.0551
80.9876	62.5876	30.9371	73.4128
67.9044	62.4167	42.5941	48.4305
94.0916	83.0586	35.4727	44.8979
88.0488	50.0757	28.491	39.3954
31.3823	50.0496	56.0376	50.6558
65.4625	88.8463	55.5022	38.4247
66.3255	158.371	36.8702	48.8447
61.1318	94.7127	64.6698	52.1656
49.1807	126.766	49.0724	64.7078
62.9313	41.638	53.5164	54.98
52.1212	77.217	63.9082	67.6064
37.8913	60.358	55.7196	121.207
84.8563	61.9046	50.1594	113.984
37.9639	57.5506	49.1726	114.971
55.6569	51.8219	48.925	81.171
49.2075	76.9809	66.9978	111.628
52.1142	45.5363	49.3108	104.619
38.9441	32.0814	46.8882	94.0773
54.4984	38.1055	55.9343	90.3854
56.1992	38.4998	41.8998	79.9298
100.417	38.6034	41.177	69.098
98.9987	65.2583	34.7046	66.7521
59.8453	48.2335	50.3893	75.917
65.787	73.7378	37.4202	67.8248
58.6862	66.1201	71.4738	47.6351
59.4469	46.2227	43.8809	43.8441
82.9384		51.0458	58.3283
52.6567		49.6805	59.9905
86.2278		67.5694	37.7992
79.4322		82.3636	36.5175
66.2319		60.1946	59.9992
50.9597		56.4055	62.527
45.5618		66.1553	65.3532
29.2979		49.5253	62.9723
50.5478		44.9953	37.4473
44.2191		53.737	53.4077
52.9828		36.1358	43.5621
54.9045		42.8308	46.5021
81.0252		62.1166	35.1194
54.7016		67.2762	53.1292
40.4175		79.6077	43.179
50.8157		72.7178	46.3089
58.4355		51.7144	47.4195
55.6699		71.3392	51.4377
48.8389		75.9201
50.4894		69.6405
54.9492		63.3447
55.1375		50.0731
52.0506		40.8427
62.93		62.4699
48.4801		44.7748
58.5656		61.7334
40.3058		46.9071
70.7047		43.4218
52.497		41.6712
51.3892		72.4758
50.8786		40.3535
62.2734		40.4362
39.2287		54.322
65.125		58.8346
59.9265		60.2056
48.0597		62.177
38.0098		61.6758
29.1481		64.1162
42.4704		36.0228
30.6228		51.4857
39.6899		53.0767
39.6194		43.291
54.0656		53.0888
54.4869		57.4429
85.8019		54.8554
50.448		49.133
86.7904		50.2765
52.4239		66.0232
81.6156
44.098
68.6847
47.6249
91.4563
69.5494
176.972
44.8979
72.0124
53.7826
91.5892
58.1574
45.1981
51.2735
48.7314
42.7624
53.1645
37.6117
36.9969
58.5692
43.8354
56.4987
42.9174
66.2947
48.579
82.8483
51.5471
52.928
54.3663
64.6227
41.309
51.8393
61.4908
51.27
47.0648
68.1651
61.3398
76.3651
59.5704
57.7507
51.1422
43.0125
35.3049
78.5468
37.1374
68.1827
67.4838
54.811
35.6537

## Sheet: cluster diameter (nm)
WT	L53D	V108D	Q393L
37.8153	25.9433	21.9158	21.3959
35.9952	22.6065	26.2302	22.8335
37.2796	24.5638	20.5301	23.2111
41.575	24.3515	24.5199	24.3368			Table Analyzed	cluster diameter (nm)			Table Analyzed	cluster diameter (nm)			Table Analyzed	cluster diameter (nm)
46.3978	25.9455	22.3254	26.2162
46.6232	24.218	24.21	26.3326			Column B	L53D			Column C	V108D			Column D	Q393L
47.1055	26.721	27.1366	25.6581			vs.	vs.			vs.	vs.			vs.	vs.
43.2189	27.3898	26.1864	26.7783			Column A	WT			Column A	WT			Column A	WT
40.881	25.3188	21.8573	27.2708
37.8153	27.3616	25.2389	27.8245			Mann Whitney test				Mann Whitney test				Mann Whitney test
35.9952	25.2241	25.3071	27.5151			P value	<0.0001			P value	<0.0001			P value	0.0617
37.2796	22.4422	19.0969	25.1391			Exact or approximate P value?	Approximate			Exact or approximate P value?	Approximate			Exact or approximate P value?	Approximate
41.575	24.1597	24.2164	27.7475			P value summary	****			P value summary	****			P value summary	ns
46.3978	23.1852	26.8787	27.0763			Significantly different (P < 0.05)?	Yes			Significantly different (P < 0.05)?	Yes			Significantly different (P < 0.05)?	No
46.6232	23.5007	20.5666	26.3783			One- or two-tailed P value?	Two-tailed			One- or two-tailed P value?	Two-tailed			One- or two-tailed P value?	Two-tailed
47.1055	23.0179	22.6386	24.2782			Sum of ranks in column A,B	33834 , 12831			Sum of ranks in column A,C	41191 , 24150			Sum of ranks in column A,D	28340 , 17413
43.2189	22.166	20.525	28.1394			Mann-Whitney U	6836			Mann-Whitney U	10455			Mann-Whitney U	9034
40.881	23.8419	23.5297	25.4875
21.6102	23.9098	27.7896	27.4197			Difference between medians				Difference between medians				Difference between medians
22.2386	24.4817	24.4337	26.0744			Median of column A	25.86, n=196			Median of column A	25.86, n=196			Median of column A	25.86, n=196
24.624	23.6149	19.6466	47.0916			Median of column B	23.96, n=109			Median of column C	24.24, n=165			Median of column D	26.69, n=106
25.2708	23.8624	20.5737	51.5176			Difference: Actual	-1.901			Difference: Actual	-1.617			Difference: Actual	0.8288
23.1291	25.2054	21.3253	61.1127			Difference: Hodges-Lehmann	-1.826			Difference: Hodges-Lehmann	-1.656			Difference: Hodges-Lehmann	0.6835
21.5132	23.2715	23.3792	49.5756
21.3693	22.1134	24.3804	46.5851
25.8477	20.902	23.3318	44.9421
24.8447	22.8703	21.8399	43.4801
27.7118	28.0189	27.8095	42.1088
22.2589	26.2555	28.1532	46.2627
23.8637	25.136	24.0454	28.9276
26.7314	25.0664	24.0117	19.9498
23.5992	23.9561	25.2868	24.2347
24.9555	25.5827	23.9901	25.9067
25.0407	24.1235	28.4826	27.9063
26.5475	26.9927	22.5418	28.9484
26.5349	24.3132	25.791	28.5292
24.0237	23.8588	25.7079	30.5296
29.3416	26.0076	26.8818	26.7293
30.0892	23.1186	27.4718	29.0737
28.4679	23.6321	24.6088	27.034
28.7713	24.0601	23.9907	24.966
26.2255	23.5089	23.7012	22.0827
22.9887	26.23	19.4632	25.5872
24.6231	26.8706	24.8578	24.1379
27.3008	27.3741	23.8225	26.6432
30.4207	31.0945	23.8474	24.4346
25.0694	29.8217	23.3549	28.7074
33.3949	30.8302	23.7291	24.5437
27.5759	28.8091	23.8753	26.2199
23.4802	27.7421	23.6618	26.1992
24.858	24.9726	24.1217	28.6999
23.6523	26.67	26.0381	27.2537
23.9349	23.1454	24.9611	27.349
25.6823	21.1318	25.8462	24.619
24.3746	22.5062	26.9459	27.2266
27.3356	20.4996	25.5279	28.416
27.0426	19.0947	23.4057	23.154
25.6751	22.5071	23.1941	28.7618
23.7798	22.0189	16.4561	24.3125
26.8537	20.5444	20.6016	22.3195
23.4049	21.031	22.6073	24.6741
24.0506	23.5847	21.3253	23.4853
24.0742	25.8961	23.297	22.5116
24.8336	22.654	20.6746	24.332
24.5039	24.1813	23.6503	23.357
20.6415	26.0595	20.8301	27.1817
25.0972	25.755	19.8377	27.7592
23.7188	31.4418	26.2275	28.4343
22.7681	28.3832	22.3527	29.1461
24.3574	33.3511	21.1979	26.0303
22.6901	31.6924	25.0967	27.9162
22.9899	27.8021	22.8533	27.8745
24.1597	30.7672	21.4829	31.2248
23.7563	29.0114	23.383	32.0655
22.9815	32.2665	22.8788	32.1558
25.2983	27.6567	23.8861	29.0434
26.3589	20.986	22.8642	27.3336
24.8093	22.6323	29.1953	26.6109
21.7181	17.129	22.0587	30.201
24.7745	24.5568	23.3425	29.3885
23.9676	22.1926	26.2788	29.2555
27.2907	22.3944	24.7657	22.1285
28.9462	24.3804	22.6931	25.9291
23.1143	20.8442	24.7229	26.2089
23.5904	21.9419	22.5995	29.5376
27.2669	22.524	23.1875	23.9803
24.8195	22.8158	23.9546	20.3149
25.3542	17.3115	25.328	26.8469
26.566	23.1627	20.7182	24.6969
24.3344	19.8334		25.1629
25.1764	21.2147		23.5213
25.0662	26.5533		26.5895
24.1386	23.1634		24.9412
26.6452	23.9118		29.1548
26.8514	20.383		27.373
25.1417	23.0877		27.1766
27.1458	26.2367		25.9555
27.6744	22.4227		26.1622
25.8696	21.6047		25.6183
25.6117	25.4119		24.3822
29.1624	25.75		22.7949
26.9502	27.2861		26.5449
27.0775	25.3685		24.599
20.4517	17.9883		26.7444
27.883	21.464		25.844
25.4631	22.4212		27.3479
26.9647	22.4245
21.9161	23.0084
24.6739	23.3777
27.7547
24.8768
27.2517
26.4928
24.1316
23.5987
26.7982
26.4936
28.754
25.1551
24.5176
27.5316
23.1402
32.021
29.8584
29.2966
24.5342
24.9383
24.8358
26.4699
33.4295
26.7112
26.7721
27.6812
28.8371
28.1054
23.4932
28.4558
27.8423
28.2311
24.7737
25.4958
26.7335
27.4875
27.1644
24.4474
25.8673
23.4935
26.5385
26.9873
24.7197
22.7258
24.7885
24.5771
22.6674
26.6097
24.6142
23.1924
26.3862
26.6508
27.0475
23.9258
25.4964
25.9873
24.9005
31.215
28.836
28.4075
31.0471
29.0812
32.903
29.0612
30.0253
26.5301
30.9283		28.9247
26.4239		24.079
29.8269		25.757
		26.8689
		27.9054
		26.9906
19.8343		27.721
20.7993		27.9669
22.5827		25.7752
24.7711		27.3942
25.8462
22.6245		25.2071
25.0329		24.0216
25.9162		26.8264
19.358		26.3745
24.2019		27.0773
23.9272		27.0122
26.5095		30.4964
24.3375		26.8459
28.3415		26.3933
26.8445		24.3929
27.4273		25.8829
25.0353		25.8574
23.4223		26.1474
25.1797		24.3198
26.7125		29.1448
		21.9577
		19.5249
		22.7415
		21.8983
		22.8712
		23.1378
		25.0945
		25.67
		25.3947
		27.1943
		28.719
		26.4227
		18.5402
		26.9882
		14.4842
		23.3072
		25.8384
		22.8725
		20.7409
		26.4847
		22.2256
		28.3292
		25.8957
		22.8985
		24.2767
		24.0448
		23.564
		24.2404
		26.4441
		24.9279
		22.2487
		23.9321
		27.0672
		27.7713
		24.9991
		27.2823
		25.462
		22.084
		21.6323
		21.1043
		26.3718
		25.5807
		25.4427
		23.775
		26.6436
		24.6095
		27.1431
		23.6068
		26.186
		23.2498
		24.424

## Sheet: Total density
WT	L53D	V108D	Q393L
0.595337	0.844296	0.636137	0.467943
0.480433	0.990008	0.632806	0.562032
0.373855	1.1224	0.7194	0.82015
0.967527	1.45712	0.915903	0.821815		Table Analyzed	Total density			Table Analyzed	Total density			Table Analyzed	Total density
1.56203	1.23147	0.850125	0.487094
1.42964	1.19567	1.48293	0.451291		Column B	L53D			Column C	V108D			Column D	Q393L
1.16153	1.73439	1.96336	1.23897		vs.	vs.			vs.	vs.			vs.	vs.
0.628643	1.39051	1.94921	1.32556		Column A	WT			Column A	WT			Column A	WT
0.794338	1.61865	0.836803	1.97752
0.595337	1.50042	1.46212	1.28893		Mann Whitney test				Mann Whitney test				Mann Whitney test
0.480433	0.745212	0.230641	0.622814		P value	0.5726			P value	0.3097			P value	0.8209
0.373855	0.514571	0.168193	0.648626		Exact or approximate P value?	Approximate			Exact or approximate P value?	Approximate			Exact or approximate P value?	Approximate
0.967527	0.68443	0.610325	0.626145		P value summary	ns			P value summary	ns			P value summary	ns
1.56203	0.925062	0.238135	0.787677		Significantly different (P < 0.05)?	No			Significantly different (P < 0.05)?	No			Significantly different (P < 0.05)?	No
1.42964	1.0816	0.240633	0.766028		One- or two-tailed P value?	Two-tailed			One- or two-tailed P value?	Two-tailed			One- or two-tailed P value?	Two-tailed
1.16153	1.24979	0.303081	0.484596		Sum of ranks in column A,B	30405 , 16260			Sum of ranks in column A,C	44463 , 52117			Sum of ranks in column A,D	29530 , 16224
0.628643	1.32223	0.286428	0.59617		Mann-Whitney U	10265			Mann-Whitney U	22471			Mann-Whitney U	10224
0.794338	1.21399	0.518734	0.598668
0.443797	1.24563	0.996669	0.906744		Difference between medians				Difference between medians				Difference between medians
0.540383	1.03747	0.71607	0.841799		Median of column A	0.9488, n=196			Median of column A	0.9488, n=196			Median of column A	0.9488, n=196
0.570358	1.4746	0.56786	1.08743		Median of column B	0.9234, n=109			Median of column C	0.9484, n=243			Median of column D	0.9271, n=106
0.603664	1.80683	0.668609	1.62864		Difference: Actual	-0.0254			Difference: Actual	-0.0004165			Difference: Actual	-0.02165
0.905079	1.41465	0.749376	2.15903		Difference: Hodges-Lehmann	-0.03247			Difference: Hodges-Lehmann	-0.03913			Difference: Hodges-Lehmann	0.009992
0.810991	1.41132	0.724396	1.33139
0.527061	1.07327	0.873439	1.11407
0.615321	1.22148	1.05412	1.49043
1.30808	2.13156	1.19151	1.0433
1.17652	1.54954	1.72273	0.448793
0.446295	1.46794	2.62115	1.37635
1.03747	1.84513	1.5562	0.420483
0.889259	1.26645	0.780183	0.349709
0.896753	1.5537	0.790175	0.89592
1.42881	0.390508	0.576187	1.02831
0.957535	0.758535	0.631973	1.2856
1.59867	0.732723	0.420483	1.62531
1.49625	0.912573	1.14155	1.46295
1.31141	0.633639	0.792673	1.70525
2.62947	0.794338	1.08326	1.17569
1.72939	0.735221	1.37386	1.16903
1.18734	0.555371	1.01748	0.606162
0.844296	1.08077	0.533722	0.510408
0.78851	1.39217	0.761865	0.2398
0.397169	1.46794	0.4796	0.531224
0.304746	2.05329	0.762698	0.478768
1.15071	2.66195	0.462115	0.510408
0.82348	2.69359	1.32473	0.531224
0.845962	2.39634	1.15654	1.00583
1.5662	2.51124	1.46128	0.512906
0.474604	1.96087	1.28476	0.813489
0.406328	1.5254	1.7552	1.70774
0.641132	1.74022	1.40466	2.2373
0.644463	0.34055	1.4463	2.06578
0.711907	0.32806	1.49375	1.54205
0.551207	0.332223	1.25395	1.51457
0.665279	0.329725	1.46545	1.42881
0.86428	0.348043	1.52623	1.37968
0.951707	0.25562	1.03247	0.819317
0.86428	0.309742	0.353872	1.67444
0.98751	0.278102	0.282265	1.22398
0.710241	0.381349	0.389675	0.975021
1.12073	0.318901	0.327227	1.18068
0.974188	0.379684	0.275604	0.88343
0.626145	0.417152	0.428809	0.77602
0.683597	0.402165	0.281432	0.682764
0.561199	0.451291	0.348876	0.963364
0.396336	0.49542	0.420483	1.32057
0.724396	0.563697	0.641132	1.96503
0.811823	1.16237	0.337219	1.5254
0.829309	1.21815	0.364696	1.21066
0.946711	1.66861	0.412989	0.863447
1.0841	1.29892	0.413822	1.02914
0.768526	1.08826	0.43547	1.2781
0.681932	1.37635	0.477102	0.793505
0.775187	1.05912	0.76353	1.45462
0.477102	1.66028	0.53622	1.41216
0.669442	0.870108	0.373855	1.42714
0.817652	0.680266	0.939217	1.10491
1.01915	0.753539	1.40966	1.85679
0.732723	0.562864	0.959201	1.14488
0.706911	0.750208	1.01998	1.34554
0.676103	1.13406	0.577852	0.636969
0.754371	0.896753	0.666112	0.817652
0.652789	1.06078	0.831807	1.16819
0.4796	0.935887	0.767694	1.71107
0.44796	0.654455	0.998335	0.383847
1.30558	0.70025	0.589509	0.370525
1.02581	0.374688	1.14987	0.508743
1.2448	0.418818	1.3189	0.667777
1.15987	0.73189	0.689425	0.577852
0.877602	0.577019	0.518734	0.566195
1.16153	0.912573	0.527893	0.565362
0.833472	0.923397	0.735221	0.928393
0.874271	0.970025	0.597002	1.2756
1.07244	1.07411	1.3622	0.895087
1.1632	0.878435	0.834305	0.886761
0.950874	1.00583	0.970025	0.706078
1.38135	0.742714	0.805162	1.50708
0.754371	0.725229	1.29559	1.77602
1.01082	0.757702	1.1607	0.82348
1.19983	0.926728	1.1199	0.602831
1.63031	0.742714	0.695254	0.676103
0.663614	0.308077	1.23647	0.72856
0.970858	0.221482	0.866778	1.39634
0.341382	0.27144	0.840133	0.925895
0.7602	0.311407	0.930058	1.65529
0.761865	0.8801	0.980849	0
0.822648	0.540383	1.09326
0.802664	0.7194	0.870108
1.03331	0.748543	1.35054
1.89009		0.898418
1.26978		0.964197
2.00916		1.02831
1.86844		1.30058
0.665279		1.00916
0.776853		1.10075
1.5612		0.913405
1.03913		1.01582
1.78351		1.11324
0.965029		1.04996
1.00083		1.02165
0.957535		1.0766
0.920899		1.62614
1.5995		1.65945
1.38385		1.72273
1.76103		1.02248
1.02082		1.30891
1.34721		1.37968
0.996669		1.42548
1.08493		1.14654
1.46128		1.23231
1.57868		0.537052
1.18485		0.538718
1.46461		0.5995
1.16819		0.828476
0.930058		0.745212
1.42631		0.877602
1.69109		0.909242
0.997502		1.16903
2.10991		1.17236
1.27644		1.37885
0.980849		1.82848
1.37219		1.26478
1.17402		0.446295
1.17569		0.455454
0.885096		0.398834
0.488759		0.483764
0.935054		1.28643
1.02748		0.40383
1.36969		0.475437
0.764363		0.651124
0.809326		0.507077
0.761032		0.973356
0.918401		1.10408
0.477935		0.948376
1.0408		1.14321
0.616986		1.22065
0.514571		0.784346
0.840133		1.09992
0.873439		1.1582
1.08493		1.07244
0.909242		0.819317
0.992506		1.27977
1.52956		1.05162
0.985845		1.51041
1.9542		0.885096
1.57119		0.933389
1.06161		0.980849
2.00416		1.09326
1.50708		0.870108
2.04246		1.35054
1.01748		0.898418
1.23231		0.964197
1.10824		1.02831
1.26395		1.30058
1.25978		1.00916
1.29475		1.10075
0.584513		0.913405
0.667777		1.01582
0.784346		1.11324
1.01166		1.04996
1.00999		1.02165
0.762698		1.0766
0.593672		1.62614
0.498751		1.65945
0.366361		1.72273
0.880933		1.02248
0.766028		1.30891
0.986678		1.37968
0.82015		1.42548
1.28643		1.14654
1.46212		1.23231
1.82764		0.537052
0.723564		0.538718
0.722731		0.5995
0.90841		0.828476
1.71274		0.745212
		0.877602
		0.909242
		1.16903
		1.17236
		1.37885
		1.82848
		1.26478
		0.446295
		0.455454
		0.398834
		0.483764
		1.28643
		0.40383
		0.475437
		0.651124
		0.507077
		0.973356
		1.10408
		0.948376
		1.14321
		1.22065
		0.784346
		1.09992
		1.1582
		1.07244
		0.819317
		1.27977
		1.05162
		1.51041
		0.885096
		0.933389
		0.518734
		0.527893
		0.735221
		0.597002
		1.3622
		0.834305
		0.970025
		0.805162
		1.29559
		1.1607
		1.1199
		0.695254
		1.23647
		0.866778
		0.840133
		0
