# Supplementary material for: The nanoscale organization of the Nipah virus fusion protein informs new membrane fusion mechanisms
Source: eLife. 2025 Jan 2;13:RP97017. doi: 10.7554/eLife.97017 (PMC11695058; doi:10.7554/eLife.97017)
Supplement: Figure 5—figure supplement 1—source data 4. [file elife-97017-fig5-figsupp1-data4.xlsx]

## Sheet: fusion
NC	WT	LI4A
0	120.404	0
0	78.125	0
0	114.89	0
0	102.022	0
0	84.5588	0
Table Analyzed	FUSION	FUSION
Column B	WT	LI4A
vs.	vs.	vs.
Column A	NC	WT
Unpaired t test with Welch's correction
P value	0.0003	0.0003
P value summary	***	***
Significantly different (P < 0.05)?	Yes	Yes
One- or two-tailed P value?	Two-tailed	Two-tailed
Welch-corrected t, df	t=12.13, df=4.000	t=12.13, df=4.000
How big is the difference?
Mean of column A	0	100
Mean of column B	100	0
Difference between means (B - A) ± SEM	100.0 ± 8.243	-100.0 ± 8.243
95% confidence interval	77.11 to 122.9	-122.9 to -77.11
R squared (eta squared)	0.9735	0.9735
F test to compare variances
F, DFn, Dfd	Infinity, 4, 4	Infinity, 4, 4
P value	<0.0001	<0.0001
P value summary	****	****
Significantly different (P < 0.05)?	Yes	Yes
Data analyzed
Sample size, column A	5	5
Sample size, column B	5	5

## Sheet: MFI
NC	WT	LI4A
9.7471	87.4411	40.6344
11.4831	113.802	39.2199
9.3999	98.757	41.1487
Table Analyzed	MFI	MFI
Column B	WT	LI4A
vs.	vs.	vs.
Column A	NC	WT
Unpaired t test with Welch's correction
P value	0.0068	0.0156
P value summary	**	*
Significantly different (P < 0.05)?	Yes	Yes
One- or two-tailed P value?	Two-tailed	Two-tailed
Welch-corrected t, df	t=11.72, df=2.028	t=7.792, df=2.023
How big is the difference?
Mean of column A	10.21	100
Mean of column B	100	40.33
Difference between means (B - A) ± SEM	89.79 ± 7.662	-59.67 ± 7.657
95% confidence interval	57.26 to 122.3	-92.26 to -27.07
R squared (eta squared)	0.9854	0.9678
F test to compare variances
F, DFn, Dfd	140.4, 2, 2	175.3, 2, 2
P value	0.0141	0.0113
P value summary	*	*
Significantly different (P < 0.05)?	Yes	Yes
Data analyzed
Sample size, column A	3	3
Sample size, column B	3	3
