# Supplementary material for: The nanoscale organization of the Nipah virus fusion protein informs new membrane fusion mechanisms
Source: eLife. 2025 Jan 2;13:RP97017. doi: 10.7554/eLife.97017 (PMC11695058; doi:10.7554/eLife.97017)
Supplement: Figure 5—figure supplement 1—source data 7. [file elife-97017-fig5-figsupp1-data7.xlsx]

## Sheet: Sheet1
	LI4A			WT			P3
4	1.55211	1.76748	1.90396	3.31553		3.20695	1.56425	1.5905	1.66696
5	1.58	1.7385	1.67031	4.13656	4.04686	4.27924	1.68046	1.68871
6	3.29152		3.14533	5.09874	5.08192	5.06088	2.15846	2.40234
				LI4A	WT	P3
			Best-fit values
			Slope	0.6861	0.9823	0.5577
			Y-intercept	-0.8746	-0.9239	-0.573
			X-intercept	1.275	0.9405	1.027
			1/slope	1.458	1.018	1.793
			Std. Error
			Slope	0.1101	0.05071	0.09411
			Y-intercept	0.5653	0.2742	0.4972
			95% Confidence Intervals
			Slope	0.4462 to 0.9259	0.8707 to 1.094	0.3481 to 0.7674
			Y-intercept	-2.106 to 0.3570	-1.527 to -0.3204	-1.681 to 0.5349
			X-intercept	-0.7854 to 2.317	0.3664 to 1.402	-1.510 to 2.229
			Goodness of Fit
			R squared	0.7639	0.9715	0.7784
			Sy.x	0.5922	0.25	0.4698
			Is slope significantly non-zero?
			F	38.83	375.2	35.12
			DFn, DFd	1, 12	1, 11	1, 10
			P value	<0.0001	<0.0001	0.0001
			Deviation from zero?	Significant	Significant	Significant
			Equation	Y = 0.6861*X - 0.8746	Y = 0.9823*X - 0.9239	Y = 0.5577*X - 0.5730
			Data
			Number of X values	15	15	15
			Maximum number of Y replicates	3	3	3
			Total number of values	14	13	12
			Number of missing values	1	2	3
