# Supplementary material for: The nanoscale organization of the Nipah virus fusion protein informs new membrane fusion mechanisms
Source: eLife. 2025 Jan 2;13:RP97017. doi: 10.7554/eLife.97017 (PMC11695058; doi:10.7554/eLife.97017)
Supplement: Figure 5—source data 2. [file elife-97017-fig5-data2.xlsx]

## Sheet: Sheet2
	WT	LI4A
	0.75753	0.76705
	0.73037	0.74786
	0.75541	0.79673
	0.74402	0.71193
	0.73688	0.73077			Table Analyzed	hopkins_mean
	0.763	0.75944
	0.74761	0.70622			Column B	LI4A
	0.75155	0.80426			vs.	vs.
	0.75683	0.74959			Column A	WT
	0.68751	0.73235
	0.7624	0.72206			Mann Whitney test
	0.78673	0.68899			P value	0.0001
	0.76991	0.67826			Exact or approximate P value?	Exact
	0.76702	0.70018			P value summary	***
	0.77207	0.70119			Significantly different (P < 0.05)?	Yes
	0.76467	0.71749			One- or two-tailed P value?	Two-tailed
	0.78672	0.69753			Sum of ranks in column A,B	2006 , 1234
	0.76335	0.6481			Mann-Whitney U	414
	0.82621	0.60867
	0.80867	0.71731			Difference between medians
	0.76664	0.76948			Median of column A	0.7640, n=40
	0.76716	0.70952			Median of column B	0.7232, n=40
	0.78689	0.79203			Difference: Actual	-0.04077
	0.80969	0.74257			Difference: Hodges-Lehmann	-0.03901
	0.83446	0.71014
	0.85409	0.7528
	0.84831	0.77703
	0.84141	0.72369
	0.7627	0.79767
	0.78695	0.77023
	0.7429	0.7039
	0.77506	0.71949
	0.7433	0.71275
	0.69163	0.75659
	0.69477	0.65302
	0.73066	0.78043
	0.81961	0.6822
	0.79793	0.7593
	0.74201	0.72279
	0.7235	0.75279
