# Supplementary material for: The nanoscale organization of the Nipah virus fusion protein informs new membrane fusion mechanisms
Source: eLife. 2025 Jan 2;13:RP97017. doi: 10.7554/eLife.97017 (PMC11695058; doi:10.7554/eLife.97017)
Supplement: Figure 5—source data 3. [file elife-97017-fig5-data3.xlsx]

## Sheet: Percentage oflocalizations in c
WT	LI4A
41.5757	54.8591
51.3496	68.2838
46.8916	70.7699
52.671	70.3377
56.0172	61.8695
61.2574	47.578
59.4652	59.4309					Table Analyzed	Percentage oflocalizations in clusters
62.0288	61.8633
55.3991	50.0319					Column B	LI4A
58.7258	62.1889					vs.	vs.
61.6763	72.2691					Column A	WT
54.1357	70.9123
51.3636	44.7748					Mann Whitney test
56.7454	56.9982					P value	0.3058
50.1337	69.8549					Exact or approximate P value?	Approximate
65.3595	57.3254					P value summary	ns
66.3477	65.9685					Significantly different (P < 0.05)?	No
53.5088	42.6917					One- or two-tailed P value?	Two-tailed
57.5978	55.6173					Sum of ranks in column A,B	33846 , 39307
52.3179	51.3089					Mann-Whitney U	16941
63.2959	50.6726
57.4856	50.5159					Difference between medians
59.7438	56.0319					Median of column A	53.75, n=171
57.701	42.7854					Median of column B	52.53, n=211
59.3767	51.3066					Difference: Actual	-1.212
53.8292	45.679					Difference: Hodges-Lehmann	-0.9708
58.75	35.8047
52.3474	30.3486
63.8322	45.6538
71.2721	36.4659
65.748	44.4586
65.9606	56.5232
64.371	49.1581
67.3694	50.067
58.1731	53.86
52.1154	40.5803
62.8644	37.3389
57.2617	35.5308
54.1405	30.7198
58.1173	53.4046
56.8282	47.5745
49.1363	51.2688
45.8853	51.6588
53.7455	51.5838
48.166	48.7247
49.5122	50.1919
48.4095	42.2581
53.9295	45.7921
49.5668	35.4686
58.7784	37.6087
47.2512	32.0908
60.575	47.0355
58.5002	39.4647
49.5606	35.2777
48.994	48.1625
37.141	46.2963
53.3854	61.3567
42.7673	58.4944
51.0305	49.0266
46.7054	61.1703
56.4116	64.3205
53.9828	59.8513
49.1573	50.386
67.5349	42.2215
65.0406	46.1855
59.1142	45.4952
64.863	54.922
51.166	51.9635
65.6746	58.6623
63.169	48.1447
68.3557	56.6347
62.5187	54.3346
64.4406	51.8099
66.0602	68.073
65.4593	72.8641
61.6227	49.8932
63.7807	47.651
58.2109	63.1447
57.2785	66.343
64.2522	61.7756
64.0086	46.1098
64.5648	52.322
50.3696	44.7505
52.9817	36.756
52.9927	49.912
56.4474	50.0294
61.6041	41.0377
42.4708	50.8708
41.0204	66.6126
45.6679	50.0218
49.846	52.5339
43.6552	50.7493
45.4505	48
44.75	62.9112
44.1503	57.6814
45.9101	63.5562
48.5	57.8262
42.1352	69.0819
52.6593	72.378
46.1915	52.1551
43.9368	50.1172
34.0557	54.2278
61.8772	52.1679
53.1279	51.6162
61.3175	54.5406
51.4734	59.4545
63.7123	53.7698
52.8351	60.461
54.6917	62.0071
51.1264	57.676
61.0348	58.5655
57.2442	61.039
58.4569	35.9659
53.7415	48.9833
64.4362	49.9527
61.2932	50.3652
54.4196	55.8361
42.3963	49.95
54.5664	53.0822
49.4807	65.9414
37.8672	53.3088
36.9469	53.3962
49.2486	61.3099
44.5587	57.1197
50.1191	45.5442
50.8458	60.4497
60.4678	45.9919
57.1114	35.0153
60.3506	64.4961
57.3604	44.183
59.7902	53.596
56.7989	59.4755
58.2492	54.4966
57.0089	60.0954
50.1999	61.6609
48.5323	47.116
41.3517	55.355
44.0041	45.2204
48.9074	55.7716
40.7591	49.4113
42.0507	71.3342
41.225	42.1442
27.113	59.0612
38.5953	61.4245
54.2431	57.7333
57.9482	72.0594
42.8571	51.8341
49.644	60.3808
37.366	56.1014
44.9328	54.2965
54.3819	54.8422
55.1822	60.7154
50.3722	56.5725
50.336	60.4484
46.9184	61.6525
47.7807	58.9617
45.5291	59.8703
42.6543	57.1188
60.0796	56.2837
55.5344	55.4827
55.26	54.005
54.6726	49.7543
41.0936	60.1746
45.7683	50.6297
50.2778	61.7617
52.6267	62.1266
54.724	51.8876
49.5074	51.2571
44.2231	57.9755
45.2859	46.1538
50.1135	54.8064
	56.9343
	51.8117
	53.1646
	54.6374
	50.173
	50.8303
	43.1843
	39.2336
	38.1204
	37.5
	46.8196
	52.6718
	58.9118
	28.7918
	47.3235
	38.2927
	31.1765
	22.9592
	35.873
	44.6288
	41.4459
	54.0843
	64.2325
	58.0825
	54.271
	52.6959
	43.3962
	49.4737
	49.187
	65.2324
	57.0648
	52.6062
	43.6397
	27.2878
	56.233
	55.9838
	59.4937
	50.7094
	42.8233
	27.4579

## Sheet: Cluster diameter
WT	LI4A
21.1157	33.6971
24.6766	33.1948
26.7149	30.5662
27.8322	33.6701
24.2584	32.7822
25.9442	26.7616
23.5972	27.5019
24.901	28.9209
24.9842	35.0937							Table Analyzed	Transform of Average cluster area (nm^2)
25.4447	32.3772
24.8952	31.7809							Column B	LI4A
24.9733	29.6876							vs.	vs.
23.6198	29.1483							Column A	WT
26.4025	26.8973
25.8542	28.1388							Mann Whitney test
24.0423	26.5042							P value	<0.0001
28.5788	31.349							Exact or approximate P value?	Approximate
24.1309	26.2544							P value summary	****
23.2831	26.0135							Significantly different (P < 0.05)?	Yes
26.0829	24.9887							One- or two-tailed P value?	Two-tailed
27.1363	27.6405							Sum of ranks in column A,B	25823 , 46948
24.8317	23.1868							Mann-Whitney U	11117
24.2259	26.9535
22.3586	26.6612							Difference between medians
23.4895	26.0299							Median of column A	24.21, n=171
23.461	22.1148							Median of column B	26.05, n=210
24.2595	21.9072							Difference: Actual	1.849
23.1907	26.8041							Difference: Hodges-Lehmann	1.833
26.0604	26.5741
26.3294	21.4871
24.2472	24.1149
28.0122	26.0902
25.3339	21.623
27.2302	26.4261
27.1645	26.1754
24.6418	25.3158
24.5613	24.8174
26.0024	25.1549
26.5497	26.0736
21.8568	23.1787
24.6621	24.326
23.9097	23.5818
22.3777	26.035
22.1723	23.3519
22.0149	25.6612
23.1012	24.4581
23.4192	23.3196
24.2052	25.0637
22.1616	25.3386
26.4829	24.5166
23.5155	22.0051
25.2199	25.7525
24.2103	21.4971
23.6332	27.3562
24.5148	25.0438
22.6369	23.1231
23.3796	27.9115
20.4881	28.136
24.6346	28.9755
23.7768	28.4341
23.5298	28.7595
24.9801	32.879
26.3209	26.1551
27.7261	27.4018
29.7402	29.0726
26.3132	27.4903
30.7897	27.107
25.9565	29.1657
25.1792	29.0943
25.109	27.4001
29.0768	28.2852
24.3861	28.2714
24.8805	29.7263
25.8668	31.8225
25.9771	23.4412
26.161	28.7718
27.7258	31.8663
25.7855	31.9445
27.9489	28.9489
27.8386	26.368
25.2564	27.7795
24.6065	28.53
23.0952	26.2617
21.0935	23.7849
26.0509	22.8658
23.3279	25.4545
27.7015	29.2967
22.0112	26.8571
22.3202	24.4844
24.5296	23.916
24.8551	27.2669
24.2808	25.1316
26.1973	27.0281
21.6065	29.3317
23.099	30.1078
19.8334	28.6117
23.8747	31.7881
22.3296	29.7192
23.8927	28.1566
23.3334	31.2006
23.0912	23.6612
20.8744	27.3188
23.7746	28.0066
23.9204	23.8594
25.769	27.7514
24.5909	28.2605
24.8747	31.1738
19.4651	32.0602
21.6988	29.4323
24.0441	27.475
23.2549	25.4192
20.8043	23.7833
23.0373	24.9253
24.5523	25.5797
27.27	24.4967
25.2213	27.6169
22.6427	25.4046
22.3336	23.6638
25.3438	27.0735
21.403	26.5564
21.2962	25.6849
18.0962	24.1588
22.7044	26.7711
21.6572	22.5573
22.4678	26.0801
21.8178	25.078
26.9433	24.7095
25.801	31.0996
27.5207	26.3679
22.8857	33.1957
24.1749	28.6073
24.8942	30.5522
23.3769	30.794
20.9399	27.4111
23.2257	25.079
22.6423	27.1725
27.5589	26.0147
27.7818	29.1591
28.0857	26.994
23.7379	32.882
21.9496	25.141
27.2108	25.4547
27.8304	26.9108
24.0963	27.1422
23.5573	31.1824
26.8693	24.3561
23.2526	27.2789
23.9789	20.7201
20.7532	26.3511
23.86	23.8419
24.7873	25.8758
23.7288	23.3492
23.7883	22.9642
21.647	22.9917
22.9502	24.09
22.6183	23.3235
20.4341	27.2723
23.5483	23.91
24.1485	25.1301
23.2199	22.8396
24.5296	26.2986
21.7969	33.9019
19.8292	29.3317
24.7615	24.7825
22.9681	27.2546
24.6528	21.336
24.7165	24.6109
20.6265	27.3661
17.9185	23.2464
21.8216	25.1819
24.6136	25.4379
	22.6446
	27.571
	22.0079
	23.8338
	29.3335
	19.1872
	24.459
	19.1832
	18.8722
	24.7655
	28.9191
	27.2184
	26.2991
	24.8849
	24.1837
	25.1012
	19.2764
	23.0577
	23.6499
	20.6096
	22.8403
	25.7238
	22.1696
	23.6644
	25.5551
	22.5852
	20.2089
	24.4504
	25.4166
	23.7936
	21.5369
	25.2701
	22.9619
	20.8953
	21.8723
	25.1819
	23.0761
	22.4611
	19.5003

## Sheet: Relative density
WT	LI4A
92.0289	67.5762
80.5433	70.0661
79.7132	84.7275
83.8388	110.184
61.2503	84.7542				Table Analyzed	Relative density
55.5232	66.551
83.1273	69.1695				Column B	LI4A
73.0704	124.262				vs.	vs.
76.6945	93.8277				Column A	WT
57.0784	114.999
64.1899	78.9179				Mann Whitney test
87.7919	107.383				P value	0.1092
136.284	97.3057				Exact or approximate P value?	Approximate
93.303	139.497				P value summary	ns
131.349	174.558				Significantly different (P < 0.05)?	No
116.505	105.343				One- or two-tailed P value?	Two-tailed
137.619	86.8506				Sum of ranks in column A,B	29691 , 41562
105.973	73.4058				Mann-Whitney U	15830
155.378	98.5685
113.282	77.9506				Difference between medians
60.7981	65.4622				Median of column A	80.79, n=166
93.7994	85.5261				Median of column B	85.60, n=211
137.994	97.1533				Difference: Actual	4.809
107.822	115.011				Difference: Hodges-Lehmann	4.067
93.3898	120.358
97.1101	101.072
115.727	76.3188
144.593	82.03
101.144	54.5292
173.571	117.965
121.701	68.3496
114.862	61.5311
123.71	76.9903
131.737	93.1319
194.074	63.9131
57.4925	95.3785
59.9616	75.5054
70.6078	75.2611
109.836	72.6206
102.675	99.5754
110.15	133.703
120.377	105.014
108.023	71.4238
118.532	71.7435
60.7777	83.5893
77.5044	107.634
75.2883	104.276
64.2623	53.1782
66.1928	52.6822
109.976	94.241
79.7842	107.483
54.2984	63.6022
168.729	89.6095
68.4288	87.4356
63.9813	64.7218
77.4907	77.9723
75.3913	77.2386
79.0532	77.912
59.7809	46.6066
48.1105	65.2311
47.0025	101.23
111.783	75.3683
78.061	87.8628
101.948	84.1291
64.9552	57.4841
68.6452	68.4352
136.338	159.668
101.301	114.318
136.761	121.793
118.432	117.769
119.161	88.5182
138.921	104.62
84.6068	99.4427
83.1943	115.596
128.909	114.623
80.1471	116.239
91.6504	91.4933
90.2068	66.4736
101.877	106.292
111.395	86.5446
62.3403	84.5708
99.94	93.1815
79.043	113.677
76.3278	175.028
79.5684	80.7423
60.0876	88.0813
57.8677	77.7216
62.7334	90.2328
66.2829	115.121
47.5204	73.8151
40.4818	125.879
55.2107	106.591
48.3031	97.0348
43.3616	109.385
75.013	87.786
69.2771	96.5958
81.474	57.1105
79.6227	86.5982
83.635	96.1367
73.5511	70.3393
160.078	79.9441
88.827	113.085
95.0395	105.383
112.4	98.2135
96.8665	129.242
82.3248	91.6442
69.8019	133.609
94.6716	83.726
104.605	78.9154
93.7642	73.7378
75.4776	93.3457
84.5157	92.4002
60.9387	68.7665
66.6501	99.6661
134.149	151.685
77.6674	104.523
105.371	109.215
56.9376	93.6472
104.574	84.7897
65.8191	119.6
62.4688	147.491
85.2392	93.3334
191.801	121.66
59.2411	95.3253
72.4027	105.664
62.9795	69.8287
81.3392	84.839
45.4057	76.9246
110.834	130.228
51.4564	77.6816
63.7641	166.044
81.1864	82.695
117.332	58.6038
126.148	65.3433
66.9477	72.0223
88.231	57.6739
97.9489	63.5044
81.0436	80.8732
91.1058	54.455
103.414	57.9445
43.6303	81.6056
66.9465	64.7749
65.739	74.6639
60.4254	60.6403
64.6771	86.7289
57.7057	102.263
74.6274	83.344
62.017	66.9614
60.8525	74.0883
50.8637	82.6839
63.458	78.334
61.4693	54.7005
62.1823	82.3946
86.8503	68.4821
74.4617	83.6746
86.1128	108.081
61.592	128.467
51.0162	85.4669
53.179	74.0427
55.675	129.264
72.9634	85.8501
100.261	110.769
114.318	69.4917
101.165	119.55
82.2599	70.6989
62.0168	93.6047
	85.848
	113.064
	74.9887
	91.5296
	58.7226
	66.6979
	52.0079
	63.8365
	165.874
	134.814
	87.9676
	103.723
	131.908
	77.6988
	64.4622
	78.0692
	108.081
	72.2634
	108.844
	82.477
	61.8083
	66.6941
	87.0319
	89.5709
	73.9634
	51.1093
	58.0916
	65.4134
	76.2479
	92.171
	61.6489
	85.6022
	89.2202
	89.7395
	91.1759
	66.2481
	88.0076
	88.8458
	106.392
	69.3636
	62.0314
	61.9501
	53.7163
	80.0093
	84.1335
