# Supplementary material for: The nanoscale organization of the Nipah virus fusion protein informs new membrane fusion mechanisms
Source: eLife. 2025 Jan 2;13:RP97017. doi: 10.7554/eLife.97017 (PMC11695058; doi:10.7554/eLife.97017)
Supplement: Figure 6—figure supplement 1—source data 4. [file elife-97017-fig6-figsupp1-data4.xlsx]

## Sheet: fusion
NC	WT	YA
0	107.33	0
0	104.712	6.5445
0	91.623	0
0	130.89	0
0	65.445	0
	Table Analyzed	FUSION					Table Analyzed	FUSION
	Column B	WT					Column C	YA
	vs.	vs.					vs.	vs.
	Column A	NC					Column B	WT
	Unpaired t test with Welch's correction						Unpaired t test with Welch's correction
	P value	0.0007					P value	0.0007
	P value summary	***					P value summary	***
	Significantly different (P < 0.05)?	Yes					Significantly different (P < 0.05)?	Yes
	One- or two-tailed P value?	Two-tailed					One- or two-tailed P value?	Two-tailed
	Welch-corrected t, df	t=9.337, df=4.000					Welch-corrected t, df	t=9.146, df=4.119
	How big is the difference?						How big is the difference?
	Mean of column A	0					Mean of column B	100
	Mean of column B	100					Mean of column C	1.309
	Difference between means (B - A) ± SEM	100.0 ± 10.71					Difference between means (C - B) ± SEM	-98.69 ± 10.79
	95% confidence interval	70.26 to 129.7					95% confidence interval	-128.3 to -69.07
	R squared (eta squared)	0.9561					R squared (eta squared)	0.9531
	F test to compare variances						F test to compare variances
	F, DFn, Dfd	Infinity, 4, 4					F, DFn, Dfd	66.96, 4, 4
	P value	<0.0001					P value	0.0013
	P value summary	****					P value summary	**
	Significantly different (P < 0.05)?	Yes					Significantly different (P < 0.05)?	Yes
	Data analyzed						Data analyzed
	Sample size, column A	5					Sample size, column B	5
	Sample size, column B	5					Sample size, column C	5

## Sheet: MFI
NC	WT	YA
9.7471	87.4411	68.2812
11.4831	113.802	59.9228
9.3999	98.757	85.6408
						Table Analyzed	MFI				Table Analyzed	MFI
						Column B	WT				Column C	YA
						vs.	vs.				vs.	vs.
						Column A	NC				Column B	WT
						Unpaired t test with Welch's correction					Unpaired t test with Welch's correction
						P value	0.0068				P value	0.0558
						P value summary	**				P value summary	ns
						Significantly different (P < 0.05)?	Yes				Significantly different (P < 0.05)?	No
						One- or two-tailed P value?	Two-tailed				One- or two-tailed P value?	Two-tailed
						Welch-corrected t, df	t=11.72, df=2.028				Welch-corrected t, df	t=2.670, df=4.000
						How big is the difference?					How big is the difference?
						Mean of column A	10.21				Mean of column B	100
						Mean of column B	100				Mean of column C	71.28
						Difference between means (B - A) ± SEM	89.79 ± 7.662				Difference between means (C - B) ± SEM	-28.72 ± 10.75
						95% confidence interval	57.26 to 122.3				95% confidence interval	-58.58 to 1.142
						R squared (eta squared)	0.9854				R squared (eta squared)	0.6406
						F test to compare variances					F test to compare variances
						F, DFn, Dfd	140.4, 2, 2				F, DFn, Dfd	1.016, 2, 2
						P value	0.0141				P value	0.992
						P value summary	*				P value summary	ns
						Significantly different (P < 0.05)?	Yes				Significantly different (P < 0.05)?	No
						Data analyzed					Data analyzed
						Sample size, column A	3				Sample size, column B	3
						Sample size, column B	3				Sample size, column C	3
