# Supplementary material for: The nanoscale organization of the Nipah virus fusion protein informs new membrane fusion mechanisms
Source: eLife. 2025 Jan 2;13:RP97017. doi: 10.7554/eLife.97017 (PMC11695058; doi:10.7554/eLife.97017)
Supplement: Figure 6—figure supplement 1—source data 7. [file elife-97017-fig6-figsupp1-data7.xlsx]

## Sheet: Sheet1
	YA			WT			P3
4	1.54968	1.69422	1.85045	3.33303		3.26729	1.58085	1.76839	1.9178
5		1.83738	1.5275	4.16781	4.09063	4.32187	1.90784	1.9042
6	3.6466	3.51852	3.39607	5.13198	5.12113	5.10549	2.16962	2.36103
	Best-fit values	YA	WT	P3
	Slope	0.7166	0.9753	0.485
	Y-intercept	-0.8753	-0.8608	-0.07225
	X-intercept	1.221	0.8826	0.149
	1/slope	1.395	1.025	2.062
	Std. Error
	Slope	0.1023	0.05329	0.09875
	Y-intercept	0.5331	0.2881	0.5218
	95% Confidence Intervals
	Slope	0.4937 to 0.9396	0.8580 to 1.093	0.2649 to 0.7050
	Y-intercept	-2.037 to 0.2862	-1.495 to -0.2267	-1.235 to 1.090
	X-intercept	-0.5704 to 2.203	0.2630 to 1.375	-4.043 to 1.783
	Goodness of Fit
	R squared	0.8034	0.9682	0.7069
	Sy.x	0.5605	0.2627	0.4929
	Is slope significantly non-zero?
	F	49.05	335	24.12
	DFn, DFd	1, 12	1, 11	1, 10
	P value	<0.0001	<0.0001	0.0006
	Deviation from zero?	Significant	Significant	Significant
	Equation	Y = 0.7166*X - 0.8753	Y = 0.9753*X - 0.8608	Y = 0.4850*X - 0.07225
	Data
	Number of X values	15	15	15
	Maximum number of Y replicates	3	3	3
	Total number of values	14	13	12
	Number of missing values	1	2	3
