# Supplementary material for: The nanoscale organization of the Nipah virus fusion protein informs new membrane fusion mechanisms
Source: eLife. 2025 Jan 2;13:RP97017. doi: 10.7554/eLife.97017 (PMC11695058; doi:10.7554/eLife.97017)
Supplement: Figure 6—source data 2. [file elife-97017-fig6-data2.xlsx]

## Sheet: Sheet1
WT	YA
0.72003	0.72352
0.73081	0.72278
0.73618	0.74094			Table Analyzed	hopkins_mean
0.72048	0.73812
0.7386	0.71745			Column B	YA
0.70587	0.73488			vs.	vs.
0.76544	0.70802			Column A	WT
0.78943	0.68026
0.72857	0.69352			Mann Whitney test
0.74567	0.69577			P value	<0.0001
0.72774	0.67393			Exact or approximate P value?	Exact
0.78455	0.71219			P value summary	****
0.75228	0.70726			Significantly different (P < 0.05)?	Yes
0.76103	0.67997			One- or two-tailed P value?	Two-tailed
0.8106	0.77195			Sum of ranks in column A,B	2204 , 1036
0.76712	0.70146			Mann-Whitney U	216
0.80789	0.73743
0.71881	0.68461			Difference between medians
0.73131	0.69291			Median of column A	0.7450, n=40
0.73418	0.70054			Median of column B	0.7089, n=40
0.72943	0.74461			Difference: Actual	-0.03612
0.71174	0.72015			Difference: Hodges-Lehmann	-0.03938
0.70717	0.70979
0.71751	0.71737
0.74207	0.71043
0.76053	0.69902
0.75798	0.71875
0.75778	0.74991
0.7267	0.68943
0.71503	0.68092
0.7993	0.67892
0.80064	0.72787
0.77872	0.70727
0.77742	0.72066
0.74438	0.68967
0.76806	0.70169
0.73501	0.6941
0.76289	0.71448
0.78401	0.6941
0.81981	0.72237
