# Supplementary material for: The nanoscale organization of the Nipah virus fusion protein informs new membrane fusion mechanisms
Source: eLife. 2025 Jan 2;13:RP97017. doi: 10.7554/eLife.97017 (PMC11695058; doi:10.7554/eLife.97017)
Supplement: Figure 6—source data 3. [file elife-97017-fig6-data3.xlsx]

## Sheet: Percentage of localizations in 
WT	YA
45.6807	38.0117
56.621	39.9449
63.1142	40.6654
69.7421	57.1326
66.3167	59.24				Table Analyzed	Percentage of localizations in clusters
60.3038	49.2359
57.1012	55.3512				Column B	YA
52.9025	50.7853				vs.	vs.
56.6231	57.3577				Column A	WT
54.0076	55.2113
63.1274	58.4471				Mann Whitney test
62.6012	62.659				P value	<0.0001
58.8321	63.6846				Exact or approximate P value?	Exact
56.1341	63.1642				P value summary	****
61.5765	52.7718				Significantly different (P < 0.05)?	Yes
52.7686	57.9266				One- or two-tailed P value?	Two-tailed
48.1089	58.0833				Sum of ranks in column A,B	7185 , 3990
59.8543	54.7269				Mann-Whitney U	987
65.8458	46.0388
67.76	40.746				Difference between medians
70.7087	42.0907				Median of column A	63.13, n=72
65.8824	47.0438				Median of column B	53.45, n=77
61.7492	52.6128				Difference: Actual	-9.684
54.3424	49.8292				Difference: Hodges-Lehmann	-9.675
68.6697	55.7488
64.6967	60.6399
67.4142	59.4459
65.1892	63.296
69.3511	52.4953
65.0068	64.6198
65.2571	43.7824
71.0413	49.2368
68.3521	55.3327
63.7213	37.7551
58.5402	53.9806
68.4625	55.8904
72.8064	53.5028
63.1379	48.331
67.8235	57.2985
71.7896	49.0134
69.7121	57.7739
62.6308	60.5784
74.897	59.0586
73.9517	50.0225
57.0776	59.9804
79.6163	46.3101
70.9515	41.8925
72.3611	59.0619
61.1801	52.4499
74.5252	50.8355
74.6458	53.1153
66.1856	51.4645
48.7342	58.082
46.7764	49.3213
51.7075	60.3109
54.0154	48.685
51.9361	50.1388
53.7718	49.1286
66.1696	51.7894
66.7574	45.6983
60.6042	46.089
64.069	57.7021
60.8889	37.1498
54.5077	47.0667
68.2392	47.2534
67.3745	57.4196
51.8471	58.8235
51.7721	61.734
64.9123	53.4483
63.089	56.3871
62.5094	60.242
57.3416	57.4068
	62.7772
	47.8714
	42.3545
	59.2851
	51.4741

## Sheet: Cluster diameter
WT	YA
24.3318	20.9413
25.9074	25.1994
23.4261	22.5305
26.8374	25.575
23.5358	23.0267					Table Analyzed	Transform of Average cluster area (nm^2)
26.3941	21.6836
24.3916	24.3142					Column B	YA
22.2998	24.0757					vs.	vs.
21.9223	25.0736					Column A	WT
23.8675	25.369
23.7391	22.0514					Mann Whitney test
27.231	23.8594					P value	<0.0001
24.5049	25.6904					Exact or approximate P value?	Exact
22.4742	24.5797					P value summary	****
24.506	22.979					Significantly different (P < 0.05)?	Yes
25.7932	28.1794					One- or two-tailed P value?	Two-tailed
23.0526	27.5907					Sum of ranks in column A,B	6978 , 4197
26.6192	24.3626					Mann-Whitney U	1194
25.7114	23.1237
26.129	24.2527					Difference between medians
27.8687	23.4597					Median of column A	26.69, n=72
25.7703	21.9239					Median of column B	24.36, n=77
22.774	27.4806					Difference: Actual	-2.325
24.7243	24.9414					Difference: Hodges-Lehmann	-2.401
25.6149	23.4112
26.472	25.5716
25.8418	24.7373
26.7004	27.1909
28.3692	22.6471
26.5564	25.933
26.3403	23.2032
26.6997	25.724
27.4728	26.8414
30.1771	26.2199
23.3293	25.6033
32.6782	26.776
27.8308	25.1189
28.5309	25.2567
30.7922	24.9017
28.9062	24.8769
30.434	24.8854
24.4346	26.1085
29.7731	23.7545
28.9545	21.7065
26.4168	25.7095
28.1301	26.0159
28.5789	23.4494
24.272	33.3716
29.1614	24.2466
34.6352	23.6975
29.3261	25.0802
26.0487	24.067
29.0947	23.8169
28.7375	24.7627
25.6566	25.8979
30.1059	20.3052
23.2711	22.5024
26.7374	23.149
27.2876	19.1187
27.0069	24.046
28.5306	22.989
27.0872	22.1844
24.6509	22.2232
27.2842	23.6936
27.3011	25.5943
29.3792	24.7259
26.1624	22.3601
26.6761	25.4376
32.8053	25.1492
28.401	23.8433
28.2157	24.4766
33.223	24.5258
	24.7633
	23.6694
	23.5757
	23.7782
	22.134

## Sheet: Relative_Density
WT	YA
70.8637	65.8732
91.7384	62.1628
97.5638	60.1104
77.0444	52.6141					Table Analyzed	Relative_Density
49.6874	56.5156
63.7147	67.9443					Column B	YA
77.6583	69.8465					vs.	vs.
70.7785	70.2036					Column A	WT
78.5944	46.062
77.247	49.1808					Mann Whitney test
70.6337	68.3003					P value	<0.0001
54.0726	63.8428					Exact or approximate P value?	Exact
67.4769	71.0146					P value summary	****
73.9694	123.78					Significantly different (P < 0.05)?	Yes
70.5692	48.445					One- or two-tailed P value?	Two-tailed
55.7442	58.1938					Sum of ranks in column A,B	6655 , 4223
69.3729	63.4346					Mann-Whitney U	1297
80.9444	125.385
73.2518	43.9727					Difference between medians
69.4539	53.1989					Median of column A	75.45, n=71
81.4424	106.34					Median of column B	62.00, n=76
79.8828	58.757					Difference: Actual	-13.45
106.484	59.2629					Difference: Hodges-Lehmann	-15.55
75.452	63.3973
89.6377	78.4225
109.601	53.6641
111.177	55.2715
75.3052	61.2469
70.4993	57.9943
167.105	68.6062
66.0785	60.511
129.814	47.1764
117.321	47.3764
65.764	41.458
69.8254	62.9943
115.558	59.4028
121.557	79.3693
158.959	57.6316
125.33	61.9725
74.5104	58.1602
78.2984	51.5583
99.4892	50.708
92.4117	48.3982
64.6063	73.1984
96.8207	50.7282
66.323	54.757
145.687	64.2122
72.784	62.0322
94.7305	57.2558
84.5948	44.661
118.415	71.8744
71.1907	46.8117
83.3468	123.351
85.3576	62.8518
66.8049	46.3208
53.4159	67.2759
65.7216	50.7539
53.7073	76.8297
60.0331	52.9811
55.6387	105.469
69.3404	80.5183
68.5105	53.3237
59.873	74.6633
82.1203	99.8004
68.7684	150.599
63.7802	86.4555
74.0074	55.554
143.474	43.9057
135.376	69.215
79.802	92.0818
97.8115	52.1953
	64.278
	69.5757
	79.2849
	78.7199
	82.5235

## Sheet: Total density
WT	YA
0.683926	0.696856
0.635622	0.670573				Table Analyzed	Total density
0.723683	0.734035
1.04493	1.18606				Column B	YA
1.18317	1.29579				vs.	vs.
1.13271	0.783324				Column A	WT
0.950162	0.929192
0.864862	0.712743				Mann Whitney test
0.756619	1.22284				P value	0.356
0.810442	1.08438				Exact or approximate P value?	Exact
0.956906	0.981383				P value summary	ns
0.785674	1.12547				Significantly different (P < 0.05)?	No
1.06471	0.929225				One- or two-tailed P value?	Two-tailed
0.977447	1.18747				Sum of ranks in column A,B	5156 , 6019
0.937886	1.10814				Mann-Whitney U	2528
0.716735	1.09586
0.800419	1.10913				Difference between medians
0.885156	1.14991				Median of column A	0.9340, n=72
0.971025	1.10017				Median of column B	0.9520, n=77
1.061	0.866984				Difference: Actual	0.01801
1.20162	0.896423				Difference: Hodges-Lehmann	0.03021
0.913875	0.879462
0.786961	1.04569
0.668378	0.84957
0.977703	0.871689
0.850602	1.21678
0.787646	1.07761
0.702365	1.29571
1.24595	0.905029
1.01948	1.1835
1.00327	0.799706
1.13228	1.04501
0.727031	1.16856
0.642863	0.860507
0.93012	0.952011
1.03374	0.908032
0.689508	0.868323
0.763742	0.906788
0.660718	0.936648
0.676575	0.877876
1.05296	1.07832
0.846112	1.18721
1.23262	1.22439
1.04633	1.02642
1.17034	1.19563
1.27229	1.00008
1.15474	0.713759
0.637186	0.997533
0.856909	1.00377
0.997085	1.16823
1.27228	0.848984
0.725715	0.98925
0.851643	0.938207
0.673802	0.90009
0.862564	1.08296
0.972609	0.955657
0.954784	1.04595
0.802753	1.12952
1.27935	0.903334
1.24662	0.938255
1.22586	0.762188
1.21947	0.667601
0.904787	0.726569
0.890803	0.692741
1.00128	0.854846
1.27914	0.798378
0.871391	0.789449
0.745322	1.14185
1.18169	1.29577
1.09159	1.00715
1.10042	0.715389
0.80479	0.99149
	1.05649
	0.749396
	0.752451
	0.824028
	0.639646
