# Supplementary material for: The nanoscale organization of the Nipah virus fusion protein informs new membrane fusion mechanisms
Source: eLife. 2025 Jan 2;13:RP97017. doi: 10.7554/eLife.97017 (PMC11695058; doi:10.7554/eLife.97017)
Supplement: Figure 6—source data 5. [file elife-97017-fig6-data5.xlsx]

## Sheet: Sheet1
NC	Pitstop2
0.74052	0.67269
0.78011	0.7247
0.75252	0.78059			Table Analyzed	hopkins_mean
0.74782	0.69846
0.77538	0.74906			Column B	Pitstop2
0.76869	0.72698			vs.	vs.
0.78313	0.70721			Column A	NC
0.75813	0.76526
0.76264	0.75097			Mann Whitney test
0.71022	0.69609			P value	0.0054
0.71867	0.75053			Exact or approximate P value?	Exact
0.73635	0.7436			P value summary	**
0.7119	0.7245			Significantly different (P < 0.05)?	Yes
0.71555	0.78869			One- or two-tailed P value?	Two-tailed
0.72608	0.70429			Sum of ranks in column A,B	1907 , 1333
0.72732	0.75596			Mann-Whitney U	513
0.76081	0.72462
0.78188	0.78685			Difference between medians
0.76625	0.70093			Median of column A	0.7607, n=40
0.70648	0.71383			Median of column B	0.7316, n=40
0.74525	0.70624			Difference: Actual	-0.02906
0.76024	0.65377			Difference: Hodges-Lehmann	-0.02558
0.74975	0.77426
0.70354	0.7836
0.7606	0.72615
0.76498	0.73499
0.76093	0.68867
0.78528	0.78194
0.7791	0.73475
0.7698	0.75378
0.83053	0.69443
0.85479	0.69443
0.83723	0.69686
0.87231	0.74089
0.84594	0.80142
0.73315	0.72854
0.72731	0.77738
0.74419	0.76021
0.77022	0.78776
0.77719	0.67137
