# Supplementary material for: The nanoscale organization of the Nipah virus fusion protein informs new membrane fusion mechanisms
Source: eLife. 2025 Jan 2;13:RP97017. doi: 10.7554/eLife.97017 (PMC11695058; doi:10.7554/eLife.97017)
Supplement: Figure 6—source data 6. [file elife-97017-fig6-data6.xlsx]

## Sheet: Percentage of localizations in 
NC	Pitstop2
68.0776	67.1244
69.3592	73.7643
68.5195	72.7528
72.417	53.9121
65.4582	51.7132
60.7075	32.0254
66.2797	59.7272
61.7574	63.1718
67.2271	41.2197					Table Analyzed	Percentage of localizations in clusters
51.6078	62.6966
66.5745	61.4023					Column B	Pitstop2
57.279	70.8978					vs.	vs.
52.7118	54.2759					Column A	NC
55.541	63.3803
69.7621	71.3511					Mann Whitney test
58.5588	48.3283					P value	0.006
62.6693	69.8923					Exact or approximate P value?	Exact
66.5936	67.4346					P value summary	**
74.445	53.5387					Significantly different (P < 0.05)?	Yes
74.0848	63.0715					One- or two-tailed P value?	Two-tailed
71.4506	56.5356					Sum of ranks in column A,B	7744 , 6284
54.1089	61.723					Mann-Whitney U	2629
56.5606	66.4585
61.2873	52.1773					Difference between medians
57.7759	56.9562					Median of column A	68.60, n=82
57.3228	63.8543					Median of column B	64.10, n=85
54.9648	50.9931					Difference: Actual	-4.495
72.3962	60.0594					Difference: Hodges-Lehmann	-3.547
70.4644	69.5448
68.2954	68.3231
64.6996	62.8971
66.6146	50.9642
44.2173	66.3938
64.5811	45.0975
54.7876	62.8951
59.4808	38.0215
73.3796	45.0397
70.9677	62.356
61.4157	56.0645
64.1245	58.0286
81.3563	65.6478
72.1961	47.3218
77.7099	74.7477
75.6694	76.3732
78.5391	72.3878
73.1407	62.7114
73.9731	71.5543
71.7484	76.1089
71.1214	77.5699
75.8924	80.3639
72.4333	52.3754
69.7541	64.2915
70.1186	72.1123
68.0566	55.1476
66.5894	63.0675
72.4168	62.4347
81.3101	68.6179
76.2107	64.1026
50.09	67.4925
55.2075	68.4114
68.6762	71.5099
68.2213	72.6213
75.1662	74.2564
74.0414	68.3584
69.1159	60.5067
72.6287	61.6328
72.0185	58.1932
69.0494	64.3432
63.309	68.7931
71.1612	73.8867
75.1089	64.5688
75.1045	67.564
64.344	64.4628
68.7575	52.2325
69.0217	65.4871
75.0459	68.7802
66.2343	60.6167
70.1084	61.196
74.8158	68.8489
63.09	57.9183
61.0229	67.8498
63.5318	75.4069
	83.5549
	71.997
	83.0848

## Sheet: Cluster diameter
NC	pitstop2
29.3296	32.3669
31.9698	34.2276
29.1765	39.1555
29.1058	28.5865
27.313	33.1461
27.1006	26.6311				Table Analyzed	Cluster diameter
30.3662	34.5947
29.5365	30.3534				Column B	pitstop2
28.5489	31.0537				vs.	vs.
25.6373	31.4193				Column A	NC
28.3012	30.6386
28.034	33.1545				Mann Whitney test
26.292	29.6823				P value	0.0057
26.3304	37.3343				Exact or approximate P value?	Exact
28.8004	32.747				P value summary	**
27.0065	32.7688				Significantly different (P < 0.05)?	Yes
29.9873	32.3982				One- or two-tailed P value?	Two-tailed
27.2717	30.3954				Sum of ranks in column A,B	5894 , 7472
32.17	30.0848				Mann-Whitney U	2491
31.2389	31.494
30.4989	32.1594				Difference between medians
26.1266	30.8755				Median of column A	28.63, n=82
27.5215	33.164				Median of column B	30.51, n=81
28.7244	28.3706				Difference: Actual	1.871
27.808	29.6841				Difference: Hodges-Lehmann	1.629
26.8201	30.5053
26.2272	31.9764
32.2514	32.877
30.3708	35.4202
28.5981	36.2483
30.7966	35.211
28.813	36.2074
26.4935	36.4016
29.3627	28.3779
24.6737	31.4771
25.0771	29.8031
28.6252	30.5486
29.9848	29.9007
28.9894	34.0622
28.9916	34.7533
33.9738	32.5999
30.4076	39.3568
31.6489	38.8564
33.2693	35.0964
31.244	33.6277
28.4682	29.8809
30.8249	30.8034
30.0215	35.9652
28.1152	34.043
32.5773	34.7202
29.0087	27.5892
28.6433	23.7104
29.1168	27.964
28.3175	26.102
30.3659	27.3217
31.7026	25.8373
32.6134	25.8346
31.8365	26.2897
37.4634	29.2743
29.9515	31.7829
31.1144	24.1719
27.6369	25.3959
28.4837	21.5323
26.5834	24.5622
25.9612	22.4875
27.4738	27.9035
27.6997	26.5129
25.8075	22.9778
26.7877	23.2274
26.3557	25.5768
29.3943	24.5008
28.8842	26.4351
25.9443	22.1935
24.8842	23.6666
27.5981	27.4893
29.6724	26.1961
26.5644	29.5774
26.7804	29.0767
26.9933	31.9788
25.2364	26.0323
24.0181	30.6172
24.7222

## Sheet: Relative density
NC	pitstop2
120.272	78.0511
81.5594	92.8026
68.2438	89.1261
86.8151	66.6204
129.027	74.6386
111.499	62.0116
72.2923	88.2165
98.1546	74.3168
74.1231	71.7701				Table Analyzed	Relative density
68.0003	155.933
96.9878	157.291				Column B	pitstop2
73.4752	120.83				vs.	vs.
61.713	100.248				Column A	NC
61.4226	83.6218
83.3435	69.9354				Mann Whitney test
86.4516	96.044				P value	0.4235
76.0343	119.437				Exact or approximate P value?	Exact
91.5028	61.9193				P value summary	ns
190.589	68.6106				Significantly different (P < 0.05)?	No
87.0256	45.6508				One- or two-tailed P value?	Two-tailed
94.1395	90.4644				Sum of ranks in column A,B	6470 , 5933
91.1296	58.8318				Mann-Whitney U	2852
66.0247	96.1464
124.143	103.733				Difference between medians
58.6097	99.0299				Median of column A	85.56, n=79
105.425	80.6458				Median of column B	85.27, n=78
87.9549	68.5019				Difference: Actual	-0.2967
72.4641	77.8493				Difference: Hodges-Lehmann	-3.041
81.5549	54.6074
64.1246	50.5513
79.0365	82.9515
95.7724	60.9996
65.8756	86.3673
150.893	57.3466
119.161	78.1857
207.134	81.133
105.622	73.0321
74.3031	102.375
68.5622	62.8184
130.777	68.6612
80.307	115.317
89.2023	109.525
131.02	85.1905
151.982	72.098
82.2825	100.148
120.733	152.847
81.3956	133.823
107.645	143.359
117.295	132.995
108.362	86.8508
116.449	85.2063
123.765	56.8842
79.9575	110.279
86.2386	84.6156
80.0093	121.586
137.503	86.3043
109.597	87.4884
67.3992	85.4976
54.2717	77.1652
68.4337	69.6417
81.6184	69.5771
83.7112	72.6313
108.62	85.3242
125.479	73.6675
76.2521	58.4744
126.314	100.643
62.5807	63.3364
113.644	93.9844
90.4646	82.8066
85.562	110.982
75.2562	107.011
65.334	115.091
85.3408	106.859
76.7408	83.8809
63.2758	103.076
80.0918	144.435
84.7585	96.8757
83.3324	91.1072
102.614

## Sheet: Total density
nc	pitstop2
0.802	1.14
1.07	1.254
1.158	1.208
1.104	0.866
0.652	0.663
1.131	0.626
1.189	1.297				Table Analyzed	Total density
1.08	0.83
1.068	0.598				Column B	pitstop2
0.978	1.001				vs.	vs.
0.967	0.533				Column A	nc
0.828	0.501
0.843	0.658				Mann Whitney test
0.935	0.651				P value	0.0607
0.953	0.916				Exact or approximate P value?	Exact
0.739	0.77				P value summary	ns
0.874	0.925				Significantly different (P < 0.05)?	No
0.801	0.666				One- or two-tailed P value?	Two-tailed
0.976	0.785				Sum of ranks in column A,B	7474 , 6554
1.089	1.196				Mann-Whitney U	2899
0.971	1.227
0.648	0.69				Difference between medians
0.937	1.248				Median of column A	0.9735, n=82
1.049	0.564				Median of column B	0.8470, n=85
1.042	0.525				Difference: Actual	-0.1265
0.66	0.737				Difference: Hodges-Lehmann	-0.0645
0.589	0.827
1.182	1.121
1.192	1.177
1.249	1.139
1.034	1.225
0.919	1.105
0.828	1.08
0.708	0.744
0.521	0.861
0.552	0.861
0.517	0.663
0.87	0.838
0.849	0.711
1.01	0.698
1.039	1.236
1.119	0.804
1.251	0.908
0.997	1.091
0.881	1.205
0.976	0.963
0.934	0.932
1.136	0.782
0.855	1.125
0.807	1.107
0.822	0.827
0.84	0.962
0.783	0.695
1.032	0.775
0.895	0.847
1.108	1.304
1	0.835
1	0.706
0.77	0.724
0.955	0.903
0.836	0.958
1.035	0.99
1.182	0.799
1.016	0.781
0.841	0.835
0.877	1.082
1.101	0.832
1.037	0.965
1.04	0.772
0.753	1.296
1.204	1.124
1.163	0.891
0.762	1.128
1.177	0.694
1.062	0.707
1.13	0.773
1.119	0.755
1.189	0.695
1.059	0.772
0.92	1.039
0.866	0.806
0.683	0.783
	1.321
	0.987
	0.898
